# Supplementary material for: Use of preoperative haemostasis and ABO blood typing tests in children: a retrospective observational study using a nationwide claims database in Japan
Source: PubMed Central journal article supplement — BMJ Open. 2019 Nov 27;9(11):e032306. doi: 10.1136/bmjopen-2019-032306 (PMC6886946; doi:10.1136/bmjopen-2019-032306), 2019-11-27
Supplement: bmjopen-2019-032306.draft_revisions.pdf [file bmjopen-2019-032306.draft_revisions.pdf]

# BMJ Open

BMJ Open is committed to open peer review. As part of this commitment we make the peer review history of every article we publish publicly available.

When an article is published we post the peer reviewers' comments and the authors' responses online. We also post the versions of the paper that were used during peer review. These are the versions that the peer review comments apply to.

The versions of the paper that follow are the versions that were submitted during the peer review process. They are not the versions of record or the final published versions. They should not be cited or distributed as the published version of this manuscript.

BMJ Open is an open access journal and the full, final, typeset and author-corrected version of record of the manuscript is available on our site with no access controls, subscription charges or pay-per-view fees (<http://bmjopen.bmj.com>).

If you have any questions on BMJ Open's open peer review process please email [info.bmjopen@bmj.com](mailto:info.bmjopen@bmj.com)

# BMJ Open

## The use of preoperative haemostasis and ABO blood typing tests in children: A retrospective observational study using a nationwide claims database

|                               |                                                                                                                                                                                                                                                                                                                                                                                                                                                                                                                                                                                                                                                                                                                                                                                                                                                                                         |
|-------------------------------|-----------------------------------------------------------------------------------------------------------------------------------------------------------------------------------------------------------------------------------------------------------------------------------------------------------------------------------------------------------------------------------------------------------------------------------------------------------------------------------------------------------------------------------------------------------------------------------------------------------------------------------------------------------------------------------------------------------------------------------------------------------------------------------------------------------------------------------------------------------------------------------------|
| Journal:                      | <i>BMJ Open</i>                                                                                                                                                                                                                                                                                                                                                                                                                                                                                                                                                                                                                                                                                                                                                                                                                                                                         |
| Manuscript ID                 | bmjopen-2019-032306                                                                                                                                                                                                                                                                                                                                                                                                                                                                                                                                                                                                                                                                                                                                                                                                                                                                     |
| Article Type:                 | Research                                                                                                                                                                                                                                                                                                                                                                                                                                                                                                                                                                                                                                                                                                                                                                                                                                                                                |
| Date Submitted by the Author: | 12-Jun-2019                                                                                                                                                                                                                                                                                                                                                                                                                                                                                                                                                                                                                                                                                                                                                                                                                                                                             |
| Complete List of Authors:     | Yonekura, Hiroshi; Mie University Hospital, Department of Clinical Anesthesiology; Kyoto University, Department of Pharmacoepidemiology<br>Ide, Kazuki; Kyoto University, Department of Pharmacoepidemiology<br>Kanazawa, Yuji; Shiga Medical Centre for Children, Department of Otolaryngology<br>Takeda, Chikashi; Kyoto University, Department of Pharmacoepidemiology<br>Nakamori, Yuki; Mie University Hospital, Department of Clinical Anesthesiology<br>Matsunari, Yasunori; Mie University Hospital, Department of Clinical Anesthesiology<br>Sakai, Michihiro; Mie University Hospital, Department of Clinical Anesthesiology<br>Kawakami, Koji; Graduate School of Medicine and Public Health, Kyoto University, Department of Pharmacoepidemiology<br>Kamei, Masataka; Mie University Graduate School of Medicine Faculty of Medicine, Department of Clinical Anesthesiology |
| Keywords:                     | Paediatric anaesthesia < PAEDIATRICS, International health services < HEALTH SERVICES ADMINISTRATION & MANAGEMENT, Change management < HEALTH SERVICES ADMINISTRATION & MANAGEMENT, Paediatric otolaryngology < OTOLARYNGOLOGY, Paediatric surgery < SURGERY                                                                                                                                                                                                                                                                                                                                                                                                                                                                                                                                                                                                                            |
|                               |                                                                                                                                                                                                                                                                                                                                                                                                                                                                                                                                                                                                                                                                                                                                                                                                                                                                                         |

SCHOLARONE™  
Manuscripts

1  
2  
3 **The use of preoperative haemostasis and ABO blood typing tests in children: A**  
4 **retrospective observational study using a nationwide claims database**  
5  
6  
7  
8  
9

10 Hiroshi Yonekura, M.D., M.P.H.<sup>a,b</sup>, Kazuki Ide, Ph.D.<sup>b</sup>, Yuji Kanazawa, M.D., Ph.D.<sup>c</sup>,  
11 Chikashi Takeda, M.D.<sup>b</sup>, Yuki Nakamori, M.D.<sup>a</sup>, Yasunori Matsunari, M.D., Ph.D.<sup>a</sup>,  
12 Michihiro Sakai, M.D., Ph.D.<sup>a</sup>, Koji Kawakami, M.D., Ph.D.<sup>b</sup>, Masataka Kamei, M.D.,  
13 Ph.D.<sup>a</sup>  
14  
15  
16  
17  
18  
19  
20

21 <sup>a</sup>Department of Clinical Anesthesiology, Mie University Hospital, 2-174 Edobashi, Tsu, Mie,  
22 514-8507, Japan  
23

24 <sup>b</sup>Department of Pharmacoepidemiology, Graduate School of Medicine and Public Health,  
25 Kyoto University, Yoshida Konoe-cho, Sakyo-ku, Kyoto, 606-8501, Japan  
26  
27

28 <sup>c</sup>Department of Otolaryngology, Shiga Medical Center for Children, 5-7-30 Moriyama,  
29 Moriyama City, Shiga, 524-0022, Japan  
30  
31  
32  
33  
34  
35  
36  
37

38 **Corresponding Author:**

39 Hiroshi Yonekura, M.D., M.P.H

40 Department of Clinical Anesthesiology,

41 Mie University, 2-174 Edobashi, Tsu, Mie 514-8507, Japan

42 Phone: +81-59-231-5634

43 Fax: +81-59-231-5140

44 Email: [hyonekura@clin.medic.mie-u.ac.jp](mailto:hyonekura@clin.medic.mie-u.ac.jp)  
45  
46  
47  
48  
49  
50  
51  
52  
53  
54  
55  
56  
57  
58  
59  
60

## ABSTRACT

**Objectives:** To describe the prevalence and factors associated with preoperative haemostasis and ABO blood typing tests for children.

**Design:** A retrospective observational study.

**Setting:** Nationwide insurance claims database in Japan

**Participants:** Patients aged 1–17 years who underwent common paediatric surgeries between April 2012 and March 2018 were included. Patients with high-risk comorbidities for bleeding (n=175) and those with multiple eligible surgeries were excluded (n=2,121).

**Main outcome measures:** We described the proportions of each preoperative test performed within 60 days before an index surgery, including platelet count, prothrombin time (PT), activated partial thromboplastin time (aPTT), and ABO blood typing tests. We also explored the associations between patient- and institutional-level factors and any preoperative tests, using multilevel logistic regression analysis.

**Results:** We included 13,018 patients (median [interquartile range] age, 5.2 [2.9–7.7] years; 8,276 [63.6%] boys) from 1,499 institutions. The overall proportion of each test was as follows: platelet count, 78.6%; PT, 54.4%; aPTT, 56.4%; and ABO blood typing tests, 50.4%. The proportion of patients undergoing any preoperative tests in the overall sample was 79.3%. Multilevel logistic regression analysis indicated that preoperative tests were associated with type of anaesthesia (general anaesthesia: adjusted OR, 7.06; 95% confidence interval [CI], 4.94–10.11), type of surgery (tonsillectomy: adjusted OR, 3.45; 95% CI, 2.75–4.33), and surgical setting (inpatient procedure: adjusted OR, 5.41; 95% CI, 3.83–7.66). There was one postoperative transfusion event (0.008%) in the entire cohort and 37 postoperative re-operation events for surgical bleeding after tonsillectomy (0.90%).

1  
2  
3 **Conclusions:** In the largest Japanese cohort reported to date, preoperative haemostasis and  
4 ABO blood typing tests were performed in a majority of children prior to common paediatric  
5 surgeries despite the low postoperative adverse events. Preoperative tests were associated  
6 with anaesthesia, surgical type, and surgical setting. Preoperative testing in this cohort should  
7 be reconsidered.  
8  
9  
10  
11  
12  
13  
14

15 **Keywords:** preoperative test, hemostasis test, blood typing test, pediatrics, overuse  
16  
17  
18  
19  
20  
21  
22  
23  
24  
25  
26  
27  
28  
29  
30  
31  
32  
33  
34  
35  
36  
37  
38  
39  
40  
41  
42  
43  
44  
45  
46  
47  
48  
49  
50  
51  
52  
53  
54  
55  
56  
57  
58  
59  
60

## STRENGTHS AND LIMITATIONS OF THIS STUDY

- This is the first and largest study to investigate the epidemiology of preoperative testing among children undergoing non-cardiac surgery by using the nationwide insurance claims database.
- The study included children who have not typically been investigated in previous studies regarding preoperative testing.
- Baseline information about overuse of preoperative tests in Japan was established.
- Limitations of this study include its retrospective nature and generalizability to other countries with different clinical practices and health care systems.
- There are the absence of details information such as patients' symptoms and results of blood tests.

## INTRODUCTION

The inappropriate use of medical service has gained much attention and has led to the Choosing Wisely (CW) initiative, which aimed to reduce unnecessary tests, treatments, and procedures.[1] As part of the CW campaign, the American Society of Anesthesiologists (ASA) recommends this: ‘Do not obtain baseline laboratory studies in patients without significant systemic disease undergoing low-risk surgery’.[2] Although practical guidelines and textbooks consistently describe the inappropriateness of routine preoperative tests,[3,4,5] they do not cover paediatric patients who will undergo elective procedures or surgeries. There is a paucity of data describing this important cohort of patients. In the guideline from the French Society of Anesthesiology and Intensive Care (SFAR), routine preoperative coagulation and ABO blood type screening tests for elective paediatric surgery were generally not recommended.[6,7] A recent national study conducted in France including 0.24 million children showed that even the re-operation rates for postoperative bleeding were very low, with a large number of patients undergoing the coagulation (49%) and ABO typing (50%) tests before adenoidectomy and tonsillectomy.[8] This French study suggested an inconsistency between the guidelines and real-world practice.[6,7,8]

In general, routine preoperative blood tests, without clinical indications, are representative of low-value care and cannot be justified.[5,9] Routine preoperative tests for children do warrant a reconsideration of their clinical utility, as they are costly, time consuming, and especially stressful (even painful) for children. Despite its clinical and public health importance, limited information is available regarding the frequency of these preoperative tests before elective paediatric surgery and the manner in which their utilisation is affected by individual patient- and institutional-level characteristics in a real-world setting. Hence, it is important to establish baseline data to understand the problem of low-value care.[10,11]

1  
2  
3 Therefore, we aimed to estimate the proportion of children who underwent preoperative  
4 haemostasis and ABO blood typing tests prior to common paediatric surgery in Japan.  
5

6  
7 Moreover, we sought to identify the patient- and institutional-level factors associated with  
8 preoperative tests.  
9  
10  
11  
12  
13  
14  
15  
16  
17  
18  
19  
20  
21  
22  
23  
24  
25  
26  
27  
28  
29  
30  
31  
32  
33  
34  
35  
36  
37  
38  
39  
40  
41  
42  
43  
44  
45  
46  
47  
48  
49  
50  
51  
52  
53  
54  
55  
56  
57  
58  
59  
60



## MATERIAL AND METHODS

No patient or public involvement in the development for design or implementation of this study. This retrospective observational study was conducted according to the ‘STrengthening the Reporting of OBservational studies in Epidemiology’ (STROBE) guidelines.[12] This study was approved by the Ethics Committee of our institution (Approval number: H2018-094), who waived the requirement for obtaining informed consent from the patients due to the anonymous nature of the data.

### Data sources

The data were provided by a commercial database vendor, JMDC Co., Ltd (Tokyo, Japan).[13] The JMDC database is one of the largest commercial claims database available in Japan, with claims from >100 health insurance associations. This database has accumulated reimbursement data from 5.6 million insured individuals since 2005. In particular, the JMDC database contains claims data of employees as well as their families, who can access freely to health care facility under universal health coverage in Japan. The database contains the following information: patient demographic information (age and sex), medical and pharmacy claims data (inpatient and outpatient), clinical diagnoses coded using the International Classification of Diseases 10<sup>th</sup> revision (ICD-10), and medical procedures defined using Japan-specific standardised procedure codes (K codes).[13,14] This database was widely used in epidemiological studies, and details of the database have been previously described.[13,14,15,16]

### Study population

We used these original Japanese K codes to identify the eligible common paediatric surgeries (otolaryngology, head and neck surgery, including tonsillectomy with or without adenoidectomy, ophthalmologic surgery [strabismus surgery or eyelid surgery for congenital

ptosis], superficial surgery [inguinal hernia or umbilical hernia], and urologic surgery [surgery of an undescended testis, hypospadias, or circumcision]; Online Supplementary Table S1) from April 1, 2012, to March 31, 2018. Included surgeries were commonly performed in children and based on the previous literature.[8] We especially chose tonsillectomy as the representative procedure in this study because tonsillectomy is one of the most commonly performed paediatric surgeries, a surgical procedure with relatively high risk of bleeding, and is a well-studied procedure in children.[8] We included patients aged 1–17 years with at least 12 months of insurance eligibility before their index surgery, who had at least 1 claim during the study period.[14] Patients with high-risk comorbidities for bleeding (i.e., patient with coagulopathy including hereditary bleeding disorders, or with any malignancy, including leukaemia and lymphoma) who underwent an eligible procedure were also excluded.[8] To eliminate the effects of within-subject correlation among patients with multiple eligible surgeries, only the first surgery per person was considered.[15]

## Outcomes

Medical claims within 60 days before the index procedure (but not including the day of the index surgery) were used to identify our primary outcome, according to previous studies,[10,15] which included the receipt of any of the following preoperative blood tests: platelet count, prothrombin time (PT), activated partial thromboplastin time (aPTT), and ABO blood typing tests.[8] The Japanese claims codes used in this study are provided in Online Supplementary Table S2.

To explore the clinical significance of these coagulation tests (PT or aPTT) more closely, we performed a supplementary analysis using a sub-cohort of restricting patients who underwent tonsillectomy with or without adenoidectomy, because their postoperative bleeding is relatively common, compared to other patients undergoing low-risk procedures. We

1  
2  
3 examined the reoperation rate attributed to bleeding 1-14 days after surgeries.[17] We  
4  
5 defined the reoperation after tonsillectomy as reoperation for haemostasis due to post-  
6  
7 tonsillectomy bleeding (K377 and K367) based on the previous studies.[17,18] In addition,  
8  
9 we collected red blood cell transfusions during the first two postoperative days (including the  
10  
11 day of index surgery) as postoperative adverse events based on the previous study.[17]  
12  
13  
14

### 15 **Predictor variables of preoperative tests**

16  
17  
18 We examined several predictors of preoperative tests, including patient demographics (age  
19  
20 and sex), comorbidities, type of anaesthesia, surgical procedure, surgical setting, and medical  
21  
22 facility status, based on clinical experience and previous literatures.[8,15]  
23  
24  
25

26  
27 Diagnostic ICD-10 codes within the 360 days before an index surgery, except the month of  
28  
29 the index surgery, were used to identify the presence of chronic comorbidities, including  
30  
31 asthma, obesity, coagulopathy, and any malignancy, including leukaemia and  
32  
33 lymphoma.[14,19] Based on the claims codes, the type of anaesthesia was categorised as  
34  
35 general anaesthesia or not. The surgical procedure was categorised as tonsillectomy (with or  
36  
37 without adenoidectomy) or other procedures. We used tonsillectomy procedures as a  
38  
39 representative scenario to compare our study with previous investigations.[8] The surgical  
40  
41 setting was classified as outpatient or inpatient procedure, based on the JMDC claims data.  
42  
43 Hospital status was determined using the JMDC medical facility code and was classified  
44  
45 according to the number of beds at the medical facility (<100, or  $\geq$ 100 beds). Teaching  
46  
47 hospital was defined as university hospital and public hospitals with advanced  
48  
49 functions.[14,15]  
50  
51  
52  
53  
54

### 55 **Statistical analysis**

Analyses were conducted based on the previously established methodology.[10,15,20] First, we performed a descriptive analysis to estimate the proportion of patients who received each kind and any of the specified preoperative tests, for the entire cohort and for each procedure category (tonsillectomy and other procedures). Continuous variables are presented as median (interquartile range), whereas categorical variables are presented as number (proportion).

To consider the nesting of all patients within medical institutions, we conducted a multilevel logistic regression analysis. We included all covariates except 'institution' as fixed effects; thus, age, sex, comorbidities, type of anaesthesia, surgical procedure, surgical setting, number of beds at the medical facility, teaching hospital status, and surgical volume quartile, were included based on clinical relevance and previous studies.[10,14,15] The institution was used as a random effect, to account for clustering effects in ordering preoperative tests across medical institutions.[10,15] The adjusted odds ratio (OR) and 95% confidence interval (CI) were reported, along with the P values. We summarised the inter-institutional variation in the utilisation pattern of preoperative tests between medical institutions in terms of the median odds ratio (MOR), which is the transformation of the random effect variance into an OR scale.[21,22,23] The MOR indicates heterogeneity in the ordering pattern of preoperative tests by comparing 2 individuals with the same covariates from 2 different randomly chosen medical institutions.[15] MOR can be directly compared to the OR of fixed-effect variables.[21,23] The 95% confidence interval for the MOR was calculated from 5,000 bootstrap resampled data sets.[22]

Subgroup analyses, as planned priori, were performed according to the type of anaesthesia (general anaesthesia vs. other anaesthesia) and the type of surgery (tonsillectomy vs. other procedures).

1  
2  
3 Restricting the sub-cohort undergoing tonsillectomy procedure, we compared the patients  
4 with coagulation tests (PT or aPTT) to those without such tests using the  $\chi^2$  test. Penalised  
5 logistic regression analysis (Firth's penalised likelihood approach) [24] adjusted for patient  
6 demographics (age, sex) was used to examine the association between preoperative  
7  
8  
9  
10  
11  
12  
13  
14  
15  
16  
17  
18  
19  
20  
21  
22  
23  
24  
25  
26  
27  
28  
29  
30  
31  
32  
33  
34  
35  
36  
37  
38  
39  
40  
41  
42  
43  
44  
45  
46  
47  
48  
49  
50  
51  
52  
53  
54  
55  
56  
57  
58  
59  
60

coagulation tests and post-tonsillectomy bleeding.

All analyses were performed using SAS 9.4 for Windows (SAS Institute Inc.; Cary, NC, USA). A 2-sided  $\alpha$  level of 0.05 was considered statistically significant.

## RESULTS

### Study cohort

Figure 1 shows the study flow diagram. The initial cohort undergoing eligible surgery consisted of 29,830 eligible procedures. The final cohort comprised 13,018 patients from 1,499 institutions between April 1, 2012, and March 31, 2018 (Figure 1).

### Characteristics of the study cohort

Table 1 summarises the patient- and institutional-level characteristics. Among the patients included, 63.6% were male (n=8,276); the overall median (IQR) age was 5.2 (2.9–7.7) years. Moreover, 80.3% (n=10,454) and 82.1% (n=10,683) of the procedures were performed in an inpatient setting and under general anaesthesia, respectively. Tonsillectomy procedures accounted for 4,104 (31.5%) of all the procedures included.

Table 1. Characteristics of the study cohort according to the procedure type

| Characteristics             | Tonsillectomy procedure<br>(n=4104) | Other procedures<br>(n=8914) | Overall<br>(n=13018) |
|-----------------------------|-------------------------------------|------------------------------|----------------------|
| Age, years                  |                                     |                              |                      |
| Median (IQR)                | 5.9 (4.7–7.9)                       | 4.4 (2.1–7.4)                | 5.2 (2.9–7.7)        |
| 1–3                         | 507 (12.4)                          | 4034 (45.3)                  | 4541(34.9)           |
| 4–10                        | 3044 (74.2)                         | 3511 (39.4)                  | 6555 (50.4)          |
| 11–17                       | 553 (13.5)                          | 1369 (15.4)                  | 1922 (14.8)          |
| Sex, male                   | 2616 (63.7)                         | 5660 (63.5)                  | 8276 (63.6)          |
| Comorbidity 12 months prior |                                     |                              |                      |

|                      |             |             |              |
|----------------------|-------------|-------------|--------------|
| Asthma               | 1948 (47.5) | 3435 (38.5) | 5383 (41.4)  |
| Obesity              | 19 (0.5)    | 16 (0.2)    | 35 (0.3)     |
| Type of anaesthesia  |             |             |              |
| General anaesthesia  | 4098 (99.9) | 6585 (73.9) | 10683 (82.1) |
| Other anaesthesia    | 6 (0.2)     | 2329 (26.1) | 2335 (17.9)  |
| Surgical setting     |             |             |              |
| Inpatient procedure  | 4097 (99.8) | 6357 (71.3) | 10454 (80.3) |
| Outpatient procedure | 7 (0.2)     | 2557 (28.7) | 2564 (19.7)  |
| Number of beds       |             |             |              |
| <100                 | 108 (2.6)   | 2221 (24.9) | 2329(17.9)   |
| ≥100                 | 3996 (97.4) | 6693 (75.1) | 10689 (82.1) |
| Teaching hospital    | 558 (13.6)  | 1712 (19.2) | 2270 (17.4)  |
| Year of surgery      |             |             |              |
| 2012                 | 285 (6.9)   | 971 (10.9)  | 1256 (9.6)   |
| 2013                 | 544 (13.3)  | 1784 (20.0) | 2328 (17.9)  |
| 2014                 | 643 (15.7)  | 1335 (15.0) | 1978 (15.2)  |
| 2015                 | 805 (19.6)  | 1391 (15.6) | 2196 (16.9)  |
| 2016                 | 843 (20.5)  | 1556 (17.5) | 2399 (18.4)  |
| 2017                 | 784 (19.1)  | 1520 (17.1) | 2304 (17.7)  |
| 2018                 | 200 (4.9)   | 357 (4.0)   | 557 (4.3)    |

---

Values are presented as frequencies (%) unless stated otherwise.

IQR, interquartile range

### Prevalence of preoperative tests

1  
2  
3 Table 2 shows the proportions of preoperative haemostasis and ABO blood typing tests for  
4 the entire cohort and for each procedure and anaesthesia category. The proportion of any  
5 preoperative test in the overall cohort was 79.3% (95% CI, 78.7%–80.0%). The overall  
6 proportion of each test was as follows: platelet count, 78.6% (95% CI, 77.9%–79.3%); PT,  
7 54.4% (95% CI, 53.5%–55.2%); aPTT, 56.4% (95% CI, 55.5%–57.2%); and ABO blood  
8 typing tests, 50.4% (95% CI, 49.5%–51.3%). The overall proportions of each test in patients  
9 undergoing tonsillectomy (4,104 patients) were higher than those undergoing other  
10 procedures (platelet count, 95.5%; PT, 83.9%; aPTT, 85.7%; and ABO blood typing tests,  
11 79.3%). The overall proportions of each test under general anaesthesia were higher than those  
12 under other anaesthetic methods.  
13  
14  
15  
16  
17  
18  
19  
20  
21  
22  
23  
24  
25  
26  
27  
28  
29  
30  
31  
32  
33  
34  
35  
36  
37  
38  
39  
40  
41  
42  
43  
44  
45  
46  
47  
48  
49  
50  
51  
52  
53  
54  
55  
56  
57  
58  
59  
60



Table 2. Proportions of preoperative haemostasis and ABO blood typing tests in the study cohort

| Type of procedure                             | Tests; % of patients (95% CI) |                  |                  |                  |                  |
|-----------------------------------------------|-------------------------------|------------------|------------------|------------------|------------------|
|                                               | Platelet count                | PT               | aPTT             | ABO              | Any tests        |
| Overall (n=13018)                             | 78.6 (77.9–79.3)              | 54.4 (53.5–55.2) | 56.4 (55.5–57.2) | 50.4 (49.5–51.3) | 79.3 (78.7–80.0) |
| Procedure category                            |                               |                  |                  |                  |                  |
| Tonsillectomy procedure (n=4104)              | 95.5 (94.9–96.1)              | 83.9 (82.7–85.0) | 85.7 (84.7–86.8) | 79.3 (78.1–80.6) | 96.7 (96.1–97.2) |
| Other procedures (n=8914)                     | 70.9 (69.9–71.8)              | 40.8 (39.8–41.8) | 42.9 (41.8–43.9) | 37.1 (36.1–38.1) | 71.4 (70.4–72.3) |
| Anaesthesia category                          |                               |                  |                  |                  |                  |
| Procedure under general anaesthesia (n=10683) | 91.0 (90.5–91.6)              | 64.9 (64.0–65.9) | 67.4 (66.5–68.3) | 61.0 (60.1–61.9) | 91.9 (91.4–92.4) |
| Procedure under other anaesthesia (n=2335)    | 21.8 (20.2–23.5)              | 5.9 (4.9–6.8)    | 5.8 (4.9–6.8)    | 1.8 (1.3–2.3)    | 22.0 (20.3–23.7) |

aPTT, activated partial thromboplastin time; CI, confidence interval; PT, prothrombin time

## Multilevel logistic regression analyses

Table 3 shows the adjusted OR of the patient- and institutional-level factors with any preoperative tests. Patient medical factors (older age or asthma) were associated with the preoperative tests, but their adjusted ORs were relatively weak. There were significant associations between any preoperative tests and the type of anaesthesia (general anaesthesia: adjusted OR, 7.06; 95% CI, 4.94–10.11) relative to the reference group of other anaesthesia, type of surgery (tonsillectomy: adjusted OR, 3.45; 95% CI, 2.75–4.33) relative to the reference group of the other procedures, and surgical setting (inpatient surgery: adjusted OR, 5.41; 95% CI, 3.83–7.66). The MOR for inter-institutional variation was 2.89 (95% CI, 2.69–3.24).

Table 3. Multilevel logistic regression analysis of the characteristics associated with any preoperative tests (haemostasis or ABO blood typing tests) for children undergoing common paediatric surgeries

| Characteristic          | Adjusted OR | 95% CI    | P value             |
|-------------------------|-------------|-----------|---------------------|
| Age, years              |             |           | <0.001 <sup>a</sup> |
| 1–3                     | Reference   |           |                     |
| 4–10                    | 1.24        | 1.06–1.44 | 0.0059              |
| 11–17                   | 1.59        | 1.28–1.97 | <0.001              |
| Sex                     |             |           |                     |
| Male                    | Reference   |           |                     |
| Female                  | 1.12        | 0.98–1.29 | 0.10                |
| Comorbidities           |             |           |                     |
| Asthma                  | 1.29        | 1.12–1.48 | <0.001              |
| Obesity                 | 1.30        | 0.28–6.05 | 0.73                |
| Type of anaesthesia     |             |           |                     |
| Not general anaesthesia | Reference   |           |                     |

|                           |           |                        |                     |
|---------------------------|-----------|------------------------|---------------------|
| General anaesthesia       | 7.06      | 4.94–10.11             | <0.001              |
| Type of procedures        |           |                        |                     |
| Other procedures          | Reference |                        |                     |
| Tonsillectomy procedure   | 3.45      | 2.75–4.33              | <0.001              |
| Surgical setting          |           |                        |                     |
| Outpatient procedure      | Reference |                        |                     |
| Inpatient procedure       | 5.41      | 3.83–7.66              | <0.001              |
| Number of beds            |           |                        |                     |
| <100                      | Reference |                        |                     |
| ≥100                      | 1.91      | 1.41–2.57              | <0.001              |
| Teaching facility         |           |                        |                     |
| Teaching hospital         | Reference |                        |                     |
| Non-teaching hospital     | 0.77      | 0.55–1.09              | 0.14                |
| Procedure volume quartile |           |                        | 0.0018 <sup>a</sup> |
| Q1 (lowest)               | Reference |                        |                     |
| Q2                        | 1.18      | 0.91–1.52              | 0.22                |
| Q3                        | 1.63      | 1.10–2.40              | 0.015               |
| Q4 (highest)              | 2.23      | 1.15–4.31              | 0.018               |
| MOR <sup>b</sup>          | 2.89      | 2.69–3.24 <sup>c</sup> |                     |

<sup>a</sup> Overall P value.

<sup>b</sup> MOR indicates the inter-institutional variation of the utilisation of preoperative tests.

<sup>c</sup> The 95% CI for MOR was calculated by bootstrap resampling method.

CI, confidence interval; MOR, median odds ratio; OR, odds ratio.

### Postoperative adverse events

The incidence of postoperative transfusion events within postoperative 2 days was 1 patient (0.008%; 1 patient underwent hernia surgery) in the whole cohort. The incidence of postoperative re-operation for surgical bleeding after tonsillectomy was 0.90% (37 of 4,104); 31 of 3527 (0.88%) in patients undergoing preoperative coagulation tests and 6 of 577 (1.04%) in patients without preoperative tests (unadjusted OR, 0.84; 95% CI, 0.35–2.03,

1  
2  
3 P=0.70). Penalised logistic regression analysis revealed that the adjusted OR of preoperative  
4  
5  
6 coagulation tests for postoperative re-operation was 0.74 (95% CI, 0.34–1.91, P=0.60).  
7  
8  
9  
10  
11  
12  
13  
14  
15  
16  
17  
18  
19  
20  
21  
22  
23  
24  
25  
26  
27  
28  
29  
30  
31  
32  
33  
34  
35  
36  
37  
38  
39  
40  
41  
42  
43  
44  
45  
46  
47  
48  
49  
50  
51  
52  
53  
54  
55  
56  
57  
58  
59  
60

For peer review only

## DISCUSSION

We found that the preoperative tests were performed in a majority of children before undergoing common paediatric surgeries. Preoperative testing was strongly associated with type of anaesthesia, type of surgery, and surgical setting. There were quite low postoperative transfusion events, and no statistically significant difference in postoperative re-operation for surgical bleeding was found between patients with or without preoperative coagulation tests.

Despite the increased overuse globally, problems of low-value care have not been well described, especially in the paediatrics.[9] To our knowledge, our study is the largest and most comprehensive population-based study investigating the preoperative tests before common paediatric surgeries. Our database could capture the whole series of preoperative tests ordered both at inpatient and outpatient settings. Therefore, our analysis can precisely describe the current preoperative testing status in Japan. Previous French nationwide cohort study did not have medical services data, including tests or procedures during inpatient episodes.[8] This recent French study showed that coagulation and ABO blood typing tests were performed in 49% and 50% of children before tonsillectomy, respectively.[8] Although the SFAR guideline did not recommend preoperative tests among children undergoing elective tonsillectomy,[6,7] there was still a high rate of unnecessary preoperative tests on paediatric patients.[8] Our results demonstrated that most children undergoing tonsillectomy underwent coagulation (PT, 84% and aPTT, 86%) and ABO blood typing (79%) tests, which were markedly higher compared to those of the recent French study.[8] Although not all of these preoperative tests are clinically inappropriate, preoperative coagulation tests for screening or predicting coagulopathy risk were not recommended. The predictive value of haemostatic tests (PT, aPTT, and platelet count) for determining perioperative bleeding risk of children undergoing tonsillectomy is generally poor, with a low sensitivity of <44% and a

1  
2  
3 positive predictive value of <29%. [7] Abnormal results were not always associated with  
4  
5 hereditary blood disease, such as haemophilia. [7,8] False positive results can trigger further  
6  
7 tests, leading to inappropriate perioperative management and delay or cancellation of elective  
8  
9 surgeries. [5,8] Furthermore, an increasing number of blood tests can worsen children and  
10  
11 parents' discomfort.  
12  
13

14  
15 Regarding the association of preoperative tests, we found a markedly high adjusted OR for  
16  
17 the type of anaesthesia and surgical setting. There was also a relatively high MOR for  
18  
19 medical institutions (i.e., the odds of receiving preoperative tests between two randomly  
20  
21 selected medical institutions varied by 2.89 times), suggesting inter-institutional variation in  
22  
23 ordering preoperative tests in children. These results were consistent with our previous report  
24  
25 on low-risk surgeries in Japan showing that preoperative blood tests performed in adult  
26  
27 patients before undergoing low-risk surgery (e.g., cataract, superficial surgery) were strongly  
28  
29 associated with the type of anaesthesia, patient characteristics, and medical facility  
30  
31 status. [14,15,16] Especially, the type of anaesthesia was the most important predictors in our  
32  
33 study focused in children and previous adult studies. [15] However, our findings were in  
34  
35 opposition to the SFAR guidelines, which recommended that haemostasis tests should not be  
36  
37 ordered regardless of anaesthesia type. [7] A guideline for preoperative tests has not been  
38  
39 established in Japan, and there is little consensus on whether preoperative testing is required,  
40  
41 leading to variations in ordering patterns. Moreover, certain hospital factors, including  
42  
43 policies for preoperative management, provider preference, or the defensive medicine, may  
44  
45 partially explain this overuse and inter-institutional variation. [14,15]  
46  
47  
48  
49  
50  
51

52  
53 Our supplementary analysis showed that the need for postoperative transfusion within 2 days  
54  
55 was very rare. Moreover, re-operation incidence for post-tonsillectomy bleeding (objective  
56  
57 and reliable end point for evaluating clinically relevant bleeding after tonsillectomy) [17,18]  
58  
59  
60

1  
2  
3 was low (0.9%), consistent with previous reports,[17,18] and there was no statistically  
4  
5 significant difference between patients with or without preoperative coagulation tests. A  
6  
7 previous randomised trial demonstrated that perioperative outcomes after low-risk surgery  
8  
9 were not different in patients with or without preoperative tests.[25] Previous studies have  
10  
11 investigated the utility of haemostasis tests in predicting bleeding risk among children  
12  
13 undergoing tonsillectomy, and a majority of studies concluded that the predictive value of  
14  
15 preoperative haemostasis tests was poor.[7] The efficacy of preoperative coagulation tests  
16  
17 before paediatric surgery remains controversial and needs further investigation.  
18  
19  
20  
21

22  
23 In 2016, the Japanese government estimated that at least 2.4 million general anaesthesia cases  
24  
25 were performed annually, with patients aged 5 years and younger accounting for 2.7% of  
26  
27 total inpatient procedures performed under general anaesthesia (approximately 65,000  
28  
29 cases).[26,27] It is apparent that increasing preoperative test overuse will burden the Japanese  
30  
31 health care system in future. Our findings could provide valuable baseline data about  
32  
33 preoperative testing overuse for not only clinicians but also for policymakers and promote the  
34  
35 need for reconsidering the routine clinical practice and the cost of these tests.[8,14]  
36  
37  
38  
39

40 This study has several limitations. First, our claims database lacked important clinical  
41  
42 information, such as patients' and family history of bleeding, symptoms, or abnormal  
43  
44 physical examination, which may have influenced the indication of preoperative tests. As we  
45  
46 did obtain neither the patient's nor the family's history of bleeding, we excluded the patients  
47  
48 with diagnostic codes indicating hereditary bleeding disorders. Second, how the abnormal  
49  
50 results of preoperative tests have affected perioperative course was unknown. As our  
51  
52 database did not have the results of the blood tests, we were not able to interpret whether the  
53  
54 coagulation test results were normal or abnormal. Therefore, we did not analyse the sequela  
55  
56 of these findings. Third, there may be a selection bias with the inclusion of only specific  
57  
58  
59  
60

1  
2  
3 paediatric surgeries in this study. However, we carefully chose to include common paediatric  
4  
5 surgeries based on the recent publications.[8,17] Additionally, we used tonsillectomy  
6  
7 procedures as a representative scenario to compare our study with previous investigations.[8]  
8  
9  
10 Finally, this nationwide study limits the results' generalisability to other countries with  
11  
12 different clinical practices and health care systems.[14,15] Compared to other developed  
13  
14 countries, ambulatory surgery is not popular in Japan (only 0.8% of general anaesthesia cases  
15  
16 underwent surgery in the outpatient setting).[26,27] Nevertheless, our study can add  
17  
18 significantly to the growing evidence on the prevalence of medical overuse worldwide.  
19  
20

## 21 **CONCLUSION**

22  
23  
24 Preoperative haemostasis and ABO blood typing tests were performed in a majority of  
25  
26 children before undergoing common paediatric surgeries despite the low postoperative  
27  
28 transfusion and re-operation events. Preoperative tests were associated with the anaesthesia  
29  
30 and surgical types, and surgical setting. It is necessary to reconsider routine preoperative  
31  
32 testing in this cohort.  
33  
34  
35  
36  
37  
38  
39  
40  
41  
42  
43  
44  
45  
46  
47  
48  
49  
50  
51  
52  
53  
54  
55  
56  
57  
58  
59  
60



### **Author Contribution**

HY conceived the study, collected, analysed, interpreted the data and results, and drafted the manuscript. KI analysed the data and performed statistical analyses. HY, KI, YK, CT, YN, YM, MS, KK, and MK conceived the study and interpreted the data and drafted the manuscript. All authors critically revised the manuscript for intellectual content. All authors read and approved the final manuscript.

### **Funding**

This work was supported in part by grants from the Pfizer Health Research Foundation.

### **Competing interest**

The authors have no conflict of interest directly relevant to the content of this article within 36 months prior to submission. KK received honoraria from Shin Nippon Biomedical Laboratories, Ltd.; research funds from Bayer Yakuhin Ltd., CMIC Co., Ltd., Novartis Pharma K.K., Suntory Beverage & Food Ltd., Dainippon Sumitomo Pharma Co., Ltd., Stella Pharma Corporation; and holds stocks in School Health Record Center Co., Ltd. and Real World Data, Co., Ltd. There are no patent products under development or marketed products to declare, relevant to those companies.

### **Checklists for the appropriate reporting statement**

This retrospective observational study was conducted according to the “STrengthening the Reporting of OBservational studies in Epidemiology” (STROBE) guidelines.

### **Patient consent for publication**

Not required.

### **Ethics statement**

1  
2  
3 This study was by the Ethics Committee of Mie University Graduate School and Faculty of  
4  
5 Medicine (approval number: H2018-094), who waived the requirement for obtaining  
6  
7 informed consent from the patients due to the anonymous nature of the data.  
8  
9

### 10 **Provenance and peer review**

11  
12 Not commissioned; externally peer reviewed.  
13

### 14 **Data sharing statement**

15  
16 The data sets analysed in this study are available from the corresponding author on  
17  
18 reasonable request.  
19  
20

21 **Acknowledgments:** We thank the staff at JMDC Co., Ltd, Tokyo, Japan, for their assistance  
22  
23 with data preparation. We also thank our colleagues from the Department of  
24  
25 Pharmacoepidemiology, Graduate School of Medicine and Public Health, Kyoto University  
26  
27 for their assistance with data preparation. The authors also thank Editage  
28  
29 (<http://www.editage.jp>) for English language editing.  
30  
31  
32  
33  
34  
35  
36  
37  
38  
39  
40  
41  
42  
43  
44  
45  
46  
47  
48  
49  
50  
51  
52  
53  
54  
55  
56  
57  
58  
59  
60

## References

- [1] Cassel CK, Guest JA. Choosing wisely: helping physicians and patients make smart decisions about their care. *JAMA* 2012;307:1801–2.
- [2] American Society of Anesthesiologists. Five things physicians and patients should question, <https://www.choosingwisely.org/societies/american-society-of-anesthesiologists/>; 2013 (accessed 14 March 2019).
- [3] National Institute for Health and Care Excellence. Routine pre-operative tests for elective surgery, <https://www.nice.org.uk/guidance/NG45>; 2016 (accessed 7 March 2019).
- [4] Committee on Standards and Practice Parameters, Apfelbaum JL, Connis RT, et al. Practice advisory for preanesthesia evaluation: an updated report by the American Society of Anesthesiologists Task Force on Preanesthesia Evaluation. *Anesthesiology* 2012;116:522–38.
- [5] Wijesundera DN, Sweitzer BJ. Preoperative evaluation. In: Miller RD, ed. *Miller's Anesthesia*. 8th ed. Philadelphia, PA: Elsevier 2015:1085–156.
- [6] Molliex S, Pierre S, Bléry C, et al. Routine preinterventional tests. *Ann Fr Anesth Reanim* 2012;31:752–63.
- [7] Bonhomme F, Ajzenberg N, Schved JF, et al. Pre-interventional haemostatic assessment: Guidelines from the French Society of Anaesthesia and Intensive Care. *Eur J Anaesthesiol* 2013;30:142–62.
- [8] Beloeil H, Ruchard D, Drewniak N, et al. Overuse of preoperative laboratory coagulation testing and ABO blood typing: a French national study. *Br J Anaesth* 2017;119:1186–193.
- [9] Brownlee S, Chalkidou K, Doust J, et al. Evidence for overuse of medical services around the world. *Lancet* 2017;390:156–68.

- 1  
2  
3 [10] Kirkham KR, Wijeyesundera DN, Pendrith C, et al. Preoperative laboratory  
4 investigations: rates and variability prior to low-risk surgical procedures.  
5  
6 *Anesthesiology* 2016;124:804–14.  
7  
8  
9  
10 [11] Kirkham KR, Wijeyesundera DN, Pendrith C, et al. Preoperative testing before low-risk  
11 surgical procedures. *CMAJ* 2015;187:E349–58.  
12  
13  
14 [12] Vandembroucke JP, Elm E von, Altman DG, et al. Strengthening the Reporting of  
15 Observational Studies in Epidemiology (STROBE): explanation and elaboration.  
16  
17 *Epidemiology* 2007;18:805–35.  
18  
19  
20 [13] Kimura S, Sato T, Ikeda S, et al. Development of a database of health insurance  
21 claims: standardization of disease classifications and anonymous record linkage. *J*  
22 *Epidemiol* 2010;20:413–19.  
23  
24  
25 [14] Yonekura H, Ide K, Seto K, et al. Preoperative pulmonary function tests before low-  
26 risk surgery in Japan: a retrospective cohort study using a claims database. *J Anesth*  
27 2018;32:23–32.  
28  
29  
30 [15] Yonekura H, Seto K, Ide K, et al. Preoperative blood tests conducted before low-risk  
31 surgery in Japan: a retrospective observational study using a nationwide insurance  
32 claims database. *Anesth Analg* 2018;126:1633–40.  
33  
34  
35 [16] Ide K, Yonekura H, Kawasaki Y, et al. Influence of institution-based factors on  
36 preoperative blood testing prior to low-risk surgery: a Bayesian generalized linear  
37 mixed approach. *Comput Math Methods Med* 2017;2017:3624075.  
38  
39  
40 [17] Miyamoto Y, Shinzawa M, Tanaka S, et al. Perioperative steroid use for tonsillectomy  
41 and its association with reoperation for posttonsillectomy hemorrhage: a retrospective  
42 cohort study. *Anesth Analg* 2018;126:806–14.  
43  
44  
45  
46  
47  
48  
49  
50  
51  
52  
53  
54  
55  
56  
57  
58  
59  
60

- 1  
2  
3 [18] Suzuki S, Yasunaga H, Matsui H, et al. Impact of systemic steroids on  
4 posttonsillectomy bleeding: analysis of 61 430 patients using a national inpatient  
5 database in Japan. *JAMA Otolaryngol Head Neck Surg* 2014;140:906–10.  
6  
7  
8  
9  
10 [19] Quan H, Li B, Couris CM, et al. Updating and validating the Charlson comorbidity  
11 index and score for risk adjustment in hospital discharge abstracts using data from 6  
12 countries. *Am J Epidemiol* 2011;173:676–82.  
13  
14  
15  
16 [20] Chen CL, Lin GA, Bardach NS, et al. Preoperative medical testing in Medicare  
17 patients undergoing cataract surgery. *N Engl J Med* 2015;372:1530–8.  
18  
19  
20 [21] Larsen K, Merlo J. Appropriate assessment of neighborhood effects on individual  
21 health: Integrating random and fixed effects in multilevel logistic regression. *Am J*  
22 *Epidemiol* 2005;161:81–8.  
23  
24  
25  
26 [22] Cordoba G, Siersma V, Lopez-valcarcel B, et al. Prescribing style and variation in  
27 antibiotic prescriptions for sore throat: cross-sectional study across six countries. *BMC*  
28 *Fam Pract* 2015;16:7.  
29  
30  
31  
32 [23] Merlo J, Chaix B, Ohlsson H, et al. A brief conceptual tutorial of multilevel analysis in  
33 social epidemiology: using measures of clustering in multilevel logistic regression to  
34 investigate contextual phenomena. *J Epidemiol Community Health* 2006;60:290–7.  
35  
36  
37  
38 [24] Heinze G. A comparative investigation of methods for logistic regression with  
39 separated or nearly separated data. *Stat Med* 2006;25:4216–26.  
40  
41  
42  
43 [25] Schein OD, Katz J, Bass EB, et al. The value of routine preoperative medical testing  
44 before cataract surgery. Study of medical testing for cataract surgery. *N Engl J Med*  
45 2000;342:168–75.  
46  
47  
48  
49 [26] Health Service Bureau, Ministry of Health, Labor and Welfare. The National Database  
50 of Health Insurance Claims and Specific Health Checkups of Japan (NDB) Open Data  
51 Japan (in Japanese).  
52  
53  
54  
55  
56  
57  
58  
59  
60

1  
2  
3 [https://www.mhlw.go.jp/stf/seisakunitsuite/bunya/0000177221\\_00002.html](https://www.mhlw.go.jp/stf/seisakunitsuite/bunya/0000177221_00002.html); 2018  
4  
5 (accessed 5 January 2019).  
6

- 7  
8 [27] Yonekura H. Epidemiology of general anesthesia practice in Japan: an ecological  
9  
10 study using open data from the national database of health insurance claims and  
11  
12 specific health checkups of Japan. *Ann Clin Anesth Res.* 2019; (in press).  
13  
14  
15  
16  
17  
18  
19  
20  
21  
22  
23  
24  
25  
26  
27  
28  
29  
30  
31  
32  
33  
34  
35  
36  
37  
38  
39  
40  
41  
42  
43  
44  
45  
46  
47  
48  
49  
50  
51  
52  
53  
54  
55  
56  
57  
58  
59  
60

1  
2  
3 **Figure legends**  
4

5  
6 Figure 1. Study flow diagram.  
7  
8

9  
10 **Supplementary material**  
11

12 Supplemental Table S1: A list of all the surgeries included in the study.  
13

14 Supplemental Table S2: A list of all the claim codes used to define the preoperative  
15  
16 haemostasis and ABO blood typing tests included in the study.  
17  
18  
19  
20  
21  
22  
23  
24  
25  
26  
27  
28  
29  
30  
31  
32  
33  
34  
35  
36  
37  
38  
39  
40  
41  
42  
43  
44  
45  
46  
47  
48  
49  
50  
51  
52  
53  
54  
55  
56  
57  
58  
59  
60

1  
2 Eligible surgeries from April 1,  
3 2012 to March 31, 2018  
4  
5 N = 29,830  
6

7  
8 16,812 excluded  
9 N = 685  
10 Patients < 1 y of age  
11 N = 13,831  
12 Patients ≥ 18 y of age  
13 N = 2,121  
14 Multiple surgeries  
15 N = 175  
16 Patients with high-risk  
17 comorbidities  
18  
19

20  
21 Available data  
22 N = 13,018  
23  
24  
25  
26  
27  
28  
29  
30  
31  
32  
33  
34  
35  
36  
37  
38  
39  
40  
41



## Supplemental Digital Content 1

**Supplemental Table 1: Common pediatric surgeries included in the study cohort**

*Procedure type*

Japanese K procedure code      Details

*Otolaryngology, head, and neck surgery*

- |      |                                                                                |
|------|--------------------------------------------------------------------------------|
| K309 | ● Tympanoplasty with tubing                                                    |
| K370 | ● Adenoidectomy                                                                |
| K377 | ● Tonsillectomy<br>(excluding the reoperation for post-tonsillectomy bleeding) |

*Ophthalmologic surgery*

- |      |                                                                   |
|------|-------------------------------------------------------------------|
| K219 | ● Blepharoptosis repair<br>(eyelid surgery for congenital ptosis) |
| K242 | ● Strabismus surgery                                              |

*Superficial surgery*

- |      |                                                       |
|------|-------------------------------------------------------|
| K633 | ● Inguinal hernia repair<br>● Umbilical hernia repair |
|------|-------------------------------------------------------|

*Urologic surgery*

- |      |                                                                 |
|------|-----------------------------------------------------------------|
| K819 | ● Hypospadias repair                                            |
| K828 | ● Circumcision                                                  |
| K836 | ● Orchidopexy<br>(surgical correction of an undescended testis) |

## Supplemental Digital Content 2

**Supplemental Table 2: All the claim codes used to define the preoperative hemostasis and ABO blood typing tests included in the study**

| <b>Any one of the following claim codes<br/>(during days 1–60 prior to the index<br/>surgery)</b> | <b>Description</b>                    |
|---------------------------------------------------------------------------------------------------|---------------------------------------|
| Platelet count                                                                                    |                                       |
| 160008010                                                                                         | Complete blood count (CBC)            |
| 160061810                                                                                         | Calculation charges                   |
| Prothrombin time (PT)                                                                             |                                       |
| 160012010                                                                                         | Prothrombin time                      |
| Activated partial thromboplastin time (aPTT)                                                      |                                       |
| 160012310                                                                                         | Activated partial thromboplastin time |
| ABO blood typing tests                                                                            |                                       |
| 160039110                                                                                         | ABO blood typing                      |
| 160039210                                                                                         | Rh phenotype determination            |

STROBE Statement—checklist of items that should be included in reports of observational studies

|                    | Item No. | Recommendation                                                                                      | Page No. | Relevant text from manuscript                                                                                                                                                                                                                                                                                                                                                                                                                                                                                                                                                                                                                                                                            |
|--------------------|----------|-----------------------------------------------------------------------------------------------------|----------|----------------------------------------------------------------------------------------------------------------------------------------------------------------------------------------------------------------------------------------------------------------------------------------------------------------------------------------------------------------------------------------------------------------------------------------------------------------------------------------------------------------------------------------------------------------------------------------------------------------------------------------------------------------------------------------------------------|
| Title and abstract | 1        | (a) Indicate the study’s design with a commonly used term in the title or the abstract              | 1, 2     | “retrospective observational study”                                                                                                                                                                                                                                                                                                                                                                                                                                                                                                                                                                                                                                                                      |
|                    |          | (b) Provide in the abstract an informative and balanced summary of what was done and what was found | 2        | “We described the proportions of each preoperative test performed within 60 days before an index surgery, including platelet count, prothrombin time (PT), activated partial thromboplastin time (aPTT), and ABO blood typing tests. We also explored the associations between patient- and institutional-level factors and any preoperative tests, using multilevel logistic regression analysis.”<br><br>“The overall proportion of each test was as follows: platelet count, 78.6%; PT, 54.4%; aPTT, 56.4%; and ABO blood typing tests, 50.4%. The proportion of patients undergoing any preoperative tests in the overall sample was 79.3%. Multilevel logistic regression analysis indicated that ” |

For peer review only

1  
2  
3  
4  
5  
6  
7  
8  
9  
10  
11  
12  
13  
14  
15  
16  
17  
18  
19  
20  
21  
22  
23  
24  
25  
26  
27  
28  
29  
30  
31  
32  
33  
34  
35  
36  
37  
38  
39  
40  
41  
42  
43  
44  
45  
46

| <b>Introduction</b>  |   |                                                                                                                                 |   |                                                                                                                                                                                                                                                                                                                            |
|----------------------|---|---------------------------------------------------------------------------------------------------------------------------------|---|----------------------------------------------------------------------------------------------------------------------------------------------------------------------------------------------------------------------------------------------------------------------------------------------------------------------------|
| Background/rationale | 2 | Explain the scientific background and rationale for the investigation being reported                                            | 5 | “Despite its clinical and public health importance, limited information is available regarding the frequency of these preoperative tests before elective paediatric surgery and the manner in which their utilisation is affected by individual patient- and institutional-level characteristics in a real-world setting.” |
| Objectives           | 3 | State specific objectives, including any prespecified hypotheses                                                                | 6 | “we aimed to estimate the proportion of children who underwent preoperative haemostasis and ABO blood typing tests prior to common paediatric surgery in Japan. Moreover, we sought to identify the patient- and institutional-level factors associated with preoperative tests.”                                          |
| <b>Methods</b>       |   |                                                                                                                                 |   |                                                                                                                                                                                                                                                                                                                            |
| Study design         | 4 | Present key elements of study design early in the paper                                                                         | 7 | “This retrospective observational study was conducted”                                                                                                                                                                                                                                                                     |
| Setting              | 5 | Describe the setting, locations, and relevant dates, including periods of recruitment, exposure, follow-up, and data collection | 7 | “The data were provided by a commercial database vendor, JMDC Co., Ltd (Tokyo, Japan)”                                                                                                                                                                                                                                     |

1  
2  
3  
4  
5  
6  
7  
8  
9  
10  
11  
12  
13  
14  
15  
16  
17  
18  
19  
20  
21  
22  
23  
24  
25  
26  
27  
28  
29  
30  
31  
32  
33  
34  
35  
36  
37  
38  
39  
40  
41  
42  
43  
44  
45  
46

Participants

6 (a) *Cohort study*—Give the eligibility criteria, and the sources and methods of selection of participants. Describe methods of follow-up  
*Case-control study*—Give the eligibility criteria, and the sources and methods of case ascertainment and control selection. Give the rationale for the choice of cases and controls  
*Cross-sectional study*—Give the eligibility criteria, and the sources and methods of selection of participants

7,  
Supplementary  
Table S1,  
8

“We used these original Japanese K codes to identify the eligible common paediatric surgeries (otolaryngology, head and neck surgery, including tonsillectomy with or without adenoidectomy, ophthalmologic surgery [strabismus surgery or eyelid surgery for congenital ptosis], superficial surgery [inguinal hernia or umbilical hernia], and urologic surgery [surgery of an undescended testis, hypospadias, or circumcision]; Online Supplementary Table S1) from April 1, 2012, to March 31, 2018”

“We included patients aged 1–17 years with at least 12 months of insurance eligibility before their index surgery, who had at least 1 claim during the study period.[14] Patients with high-risk comorbidities for bleeding (i.e., patient with coagulopathy including hereditary bleeding disorders, or with any malignancy, including leukaemia and lymphoma) who underwent an eligible procedure

For peer review only

|                              |    |                                                                                                                                                                                                                        |                                    |                                                                                                                                                                                                                                                                                                                                                                                                                                                                |
|------------------------------|----|------------------------------------------------------------------------------------------------------------------------------------------------------------------------------------------------------------------------|------------------------------------|----------------------------------------------------------------------------------------------------------------------------------------------------------------------------------------------------------------------------------------------------------------------------------------------------------------------------------------------------------------------------------------------------------------------------------------------------------------|
|                              |    |                                                                                                                                                                                                                        |                                    | were also excluded.[8] To eliminate the effects of within-subject correlation among patients with multiple eligible surgeries, only the first surgery per person was considered.”                                                                                                                                                                                                                                                                              |
|                              |    | (b) <i>Cohort study</i> —For matched studies, give matching criteria and number of exposed and unexposed<br><i>Case-control study</i> —For matched studies, give matching criteria and the number of controls per case |                                    |                                                                                                                                                                                                                                                                                                                                                                                                                                                                |
| Variables                    | 7  | Clearly define all outcomes, exposures, predictors, potential confounders, and effect modifiers.<br>Give diagnostic criteria, if applicable                                                                            | 8, 9,<br>Supplementary<br>Table S2 | “Medical claims within 60 days before the index procedure (but not including the day of the index surgery) were used to identify our primary outcome, according to previous studies”<br><br>“We examined several predictors of preoperative tests, including patient demographics (age and sex), comorbidities, type of anaesthesia, surgical procedure, surgical setting, and medical facility status, based on clinical experience and previous literatures” |
| Data sources/<br>measurement | 8* | For each variable of interest, give sources of data and details of methods of assessment (measurement). Describe comparability of assessment methods if there is more than one group                                   | 8,<br>Supplementary<br>Table S2    | “the receipt of any of the following preoperative blood tests: platelet count, prothrombin time (PT), activated partial thromboplastin                                                                                                                                                                                                                                                                                                                         |

1  
2  
3  
4  
5  
6  
7  
8  
9  
10  
11  
12  
13  
14  
15  
16  
17  
18  
19  
20  
21  
22  
23  
24  
25  
26  
27  
28  
29  
30  
31  
32  
33  
34  
35  
36  
37  
38  
39  
40  
41  
42  
43  
44  
45  
46

|            |    |                                                           |   |                                                                                                                                                                                                                                                                                                                                                                                                               |
|------------|----|-----------------------------------------------------------|---|---------------------------------------------------------------------------------------------------------------------------------------------------------------------------------------------------------------------------------------------------------------------------------------------------------------------------------------------------------------------------------------------------------------|
|            |    |                                                           |   | time (aPTT), and ABO blood typing tests.[8] The Japanese claims codes used in this study are provided in Online Supplementary Table S2.”                                                                                                                                                                                                                                                                      |
| Bias       | 9  | Describe any efforts to address potential sources of bias | 8 | “Patients with high-risk comorbidities for bleeding (i.e., patient with coagulopathy including hereditary bleeding disorders, or with any malignancy, including leukaemia and lymphoma) who underwent an eligible procedure were also excluded.[8] To eliminate the effects of within-subject correlation among patients with multiple eligible surgeries, only the first surgery per person was considered.” |
| Study size | 10 | Explain how the study size was arrived at                 |   | No relevant text                                                                                                                                                                                                                                                                                                                                                                                              |

Continued on next page

For peer review only

|                        |     |                                                                                                                                                                                                                                                                                                           |              |                                                                                                                                                               |
|------------------------|-----|-----------------------------------------------------------------------------------------------------------------------------------------------------------------------------------------------------------------------------------------------------------------------------------------------------------|--------------|---------------------------------------------------------------------------------------------------------------------------------------------------------------|
| Quantitative variables | 11  | Explain how quantitative variables were handled in the analyses. If applicable, describe which groupings were chosen and why                                                                                                                                                                              |              | No relevant text                                                                                                                                              |
| Statistical methods    | 12  | (a) Describe all statistical methods, including those used to control for confounding                                                                                                                                                                                                                     | 10           | “To consider the nesting of all patients within medical institutions, we conducted a multilevel logistic regression analysis.”                                |
|                        |     | (b) Describe any methods used to examine subgroups and interactions                                                                                                                                                                                                                                       |              | No relevant text                                                                                                                                              |
|                        |     | (c) Explain how missing data were addressed                                                                                                                                                                                                                                                               |              | No relevant text                                                                                                                                              |
|                        |     | (d) <i>Cohort study</i> —If applicable, explain how loss to follow-up was addressed<br><i>Case-control study</i> —If applicable, explain how matching of cases and controls was addressed<br><i>Cross-sectional study</i> —If applicable, describe analytical methods taking account of sampling strategy |              | There were no follow-up cases.<br>no relevant text                                                                                                            |
|                        |     | (e) Describe any sensitivity analyses                                                                                                                                                                                                                                                                     |              | No relevant text                                                                                                                                              |
| <b>Results</b>         |     |                                                                                                                                                                                                                                                                                                           |              |                                                                                                                                                               |
| Participants           | 13* | (a) Report numbers of individuals at each stage of study—eg numbers potentially eligible, examined for eligibility, confirmed eligible, included in the study, completing follow-up, and analysed                                                                                                         | 12           | “Figure 1 shows the study diagram.”                                                                                                                           |
|                        |     | (b) Give reasons for non-participation at each stage                                                                                                                                                                                                                                                      | Figure 1     | Figure 1 gives reasons for non-participation at each stage.                                                                                                   |
|                        |     | (c) Consider use of a flow diagram                                                                                                                                                                                                                                                                        | 12, Figure 1 | “Figure 1 shows the study diagram.”                                                                                                                           |
| Descriptive data       | 14* | (a) Give characteristics of study participants (eg demographic, clinical, social) and information on exposures and potential confounders                                                                                                                                                                  | 12, Table 1  | “Table 1 summarises the patient- and institutional-level characteristics.”                                                                                    |
|                        |     | (b) Indicate number of participants with missing data for each variable of interest                                                                                                                                                                                                                       |              | No participants with missing data                                                                                                                             |
|                        |     | (c) <i>Cohort study</i> —Summarise follow-up time (eg, average and total amount)                                                                                                                                                                                                                          |              | No relevant text                                                                                                                                              |
| Outcome data           | 15* | <i>Cohort study</i> —Report numbers of outcome events or summary measures over time                                                                                                                                                                                                                       | 14, Table 2  | “Table 2 shows the proportions of preoperative haemostasis and ABO blood typing tests for the entire cohort and for each procedure and anaesthesia category.” |



1  
2  
3  
4  
5  
6  
7  
8  
9  
10  
11  
12  
13  
14  
15  
16  
17  
18  
19  
20  
21  
22  
23  
24  
25  
26  
27  
28  
29  
30  
31  
32  
33  
34  
35  
36  
37  
38  
39  
40  
41  
42  
43  
44  
45  
46

---

|              |    |                                                                                                                                                                                                              |             |                                                                                                                                                                                                                                                      |
|--------------|----|--------------------------------------------------------------------------------------------------------------------------------------------------------------------------------------------------------------|-------------|------------------------------------------------------------------------------------------------------------------------------------------------------------------------------------------------------------------------------------------------------|
|              |    | <i>Case-control study</i> —Report numbers in each exposure category, or summary measures of exposure                                                                                                         |             |                                                                                                                                                                                                                                                      |
|              |    | <i>Cross-sectional study</i> —Report numbers of outcome events or summary measures                                                                                                                           |             |                                                                                                                                                                                                                                                      |
| Main results | 16 | (a) Give unadjusted estimates and, if applicable, confounder-adjusted estimates and their precision (eg, 95% confidence interval). Make clear which confounders were adjusted for and why they were included | 16, Table 3 | “Table 3 shows the adjusted OR of the patient- and institutional-level factors with any preoperative tests. Patient medical factors (older age or asthma) were associated with the preoperative tests, but their adjusted ORs were relatively weak.” |
|              |    | (b) Report category boundaries when continuous variables were categorized                                                                                                                                    |             |                                                                                                                                                                                                                                                      |
|              |    | © If relevant, consider translating estimates of relative risk into absolute risk for a meaningful time period                                                                                               |             |                                                                                                                                                                                                                                                      |

---

Continued on next page

|    |                   |    |                                                                                                |    |
|----|-------------------|----|------------------------------------------------------------------------------------------------|----|
| 1  |                   |    |                                                                                                |    |
| 2  | Other analyses    | 17 | Report other analyses done—eg analyses of subgroups and interactions, and sensitivity analyses | 14 |
| 3  |                   |    |                                                                                                |    |
| 4  |                   |    |                                                                                                |    |
| 5  |                   |    |                                                                                                |    |
| 6  |                   |    |                                                                                                |    |
| 7  |                   |    |                                                                                                |    |
| 8  |                   |    |                                                                                                |    |
| 9  |                   |    |                                                                                                |    |
| 10 |                   |    |                                                                                                |    |
| 11 |                   |    |                                                                                                |    |
| 12 |                   |    |                                                                                                |    |
| 13 |                   |    |                                                                                                |    |
| 14 |                   |    |                                                                                                |    |
| 15 |                   |    |                                                                                                |    |
| 16 |                   |    |                                                                                                |    |
| 17 | <b>Discussion</b> |    |                                                                                                |    |
| 18 | Key results       | 18 | Summarise key results with reference to study objectives                                       | 19 |
| 19 |                   |    |                                                                                                |    |
| 20 |                   |    |                                                                                                |    |
| 21 |                   |    |                                                                                                |    |
| 22 |                   |    |                                                                                                |    |
| 23 |                   |    |                                                                                                |    |
| 24 |                   |    |                                                                                                |    |
| 25 |                   |    |                                                                                                |    |
| 26 |                   |    |                                                                                                |    |
| 27 |                   |    |                                                                                                |    |
| 28 |                   |    |                                                                                                |    |
| 29 |                   |    |                                                                                                |    |
| 30 |                   |    |                                                                                                |    |
| 31 |                   |    |                                                                                                |    |
| 32 |                   |    |                                                                                                |    |
| 33 |                   |    |                                                                                                |    |
| 34 |                   |    |                                                                                                |    |
| 35 |                   |    |                                                                                                |    |
| 36 |                   |    |                                                                                                |    |
| 37 |                   |    |                                                                                                |    |
| 38 |                   |    |                                                                                                |    |
| 39 |                   |    |                                                                                                |    |
| 40 |                   |    |                                                                                                |    |
| 41 |                   |    |                                                                                                |    |
| 42 |                   |    |                                                                                                |    |
| 43 |                   |    |                                                                                                |    |
| 44 |                   |    |                                                                                                |    |
| 45 |                   |    |                                                                                                |    |
| 46 |                   |    |                                                                                                |    |

1  
2  
3  
4  
5  
6  
7  
8  
9  
10  
11  
12  
13  
14  
15  
16  
17  
18  
19  
20  
21  
22  
23  
24  
25  
26  
27  
28  
29  
30  
31  
32  
33  
34  
35  
36  
37  
38  
39  
40  
41  
42  
43  
44  
45  
46

---

|                  |    |                                                                                                                                                                            |    |                                                                                                                                                                                                                                                                                                                                                                                              |
|------------------|----|----------------------------------------------------------------------------------------------------------------------------------------------------------------------------|----|----------------------------------------------------------------------------------------------------------------------------------------------------------------------------------------------------------------------------------------------------------------------------------------------------------------------------------------------------------------------------------------------|
|                  |    |                                                                                                                                                                            |    | between patients with or without preoperative coagulation tests.”                                                                                                                                                                                                                                                                                                                            |
| Limitations      | 19 | Discuss limitations of the study, taking into account sources of potential bias or imprecision. Discuss both direction and magnitude of any potential bias                 | 21 | “This study has several limitations.”                                                                                                                                                                                                                                                                                                                                                        |
| Interpretation   | 20 | Give a cautious overall interpretation of results considering objectives, limitations, multiplicity of analyses, results from similar studies, and other relevant evidence | 22 | “Preoperative haemostasis and ABO blood typing tests were performed in a majority of children before undergoing common paediatric surgeries despite the low postoperative transfusion and re-operation events. Preoperative tests were associated with the anaesthesia and surgical types, and surgical setting. It is necessary to reconsider routine preoperative testing in this cohort.” |
| Generalisability | 21 | Discuss the generalisability (external validity) of the study results                                                                                                      | 22 | “Finally, this nationwide study limits the results’ generalisability to other countries with different clinical practices and health care systems.[14,15] Compared to other developed countries, ambulatory                                                                                                                                                                                  |

---

For peer review only

surgery is not popular in Japan (only 0.8% of general anaesthesia cases underwent surgery in the outpatient setting).[26,27] Nevertheless, our study can add significantly to the growing evidence on the prevalence of medical overuse worldwide.”

---

#### Other information

|         |    |                                                                                                                                                               |    |                                                                                         |
|---------|----|---------------------------------------------------------------------------------------------------------------------------------------------------------------|----|-----------------------------------------------------------------------------------------|
| Funding | 22 | Give the source of funding and the role of the funders for the present study and, if applicable, for the original study on which the present article is based | 23 | “This work was supported in part by grants from the Pfizer Health Research Foundation.” |
|---------|----|---------------------------------------------------------------------------------------------------------------------------------------------------------------|----|-----------------------------------------------------------------------------------------|

\*Give information separately for cases and controls in case-control studies and, if applicable, for exposed and unexposed groups in cohort and cross-sectional studies.

**Note:** An Explanation and Elaboration article discusses each checklist item and gives methodological background and published examples of transparent reporting. The STROBE checklist is best used in conjunction with this article (freely available on the Web sites of PLoS Medicine at <http://www.plosmedicine.org/>, Annals of Internal Medicine at <http://www.annals.org/>, and Epidemiology at <http://www.epidem.com/>). Information on the STROBE Initiative is available at [www.strobe-statement.org](http://www.strobe-statement.org).

# BMJ Open

## The use of preoperative haemostasis and ABO blood typing tests in children: A retrospective observational study using a nationwide claims database in Japan

|                                 |                                                                                                                                                                                                                                                                                                                                                                                                                                                                                                                                                                                                                                                                                                                                                                                                                                                                                         |
|---------------------------------|-----------------------------------------------------------------------------------------------------------------------------------------------------------------------------------------------------------------------------------------------------------------------------------------------------------------------------------------------------------------------------------------------------------------------------------------------------------------------------------------------------------------------------------------------------------------------------------------------------------------------------------------------------------------------------------------------------------------------------------------------------------------------------------------------------------------------------------------------------------------------------------------|
| Journal:                        | <i>BMJ Open</i>                                                                                                                                                                                                                                                                                                                                                                                                                                                                                                                                                                                                                                                                                                                                                                                                                                                                         |
| Manuscript ID                   | bmjopen-2019-032306.R1                                                                                                                                                                                                                                                                                                                                                                                                                                                                                                                                                                                                                                                                                                                                                                                                                                                                  |
| Article Type:                   | Original research                                                                                                                                                                                                                                                                                                                                                                                                                                                                                                                                                                                                                                                                                                                                                                                                                                                                       |
| Date Submitted by the Author:   | 23-Oct-2019                                                                                                                                                                                                                                                                                                                                                                                                                                                                                                                                                                                                                                                                                                                                                                                                                                                                             |
| Complete List of Authors:       | Yonekura, Hiroshi; Mie University Hospital, Department of Clinical Anesthesiology; Kyoto University, Department of Pharmacoepidemiology<br>Ide, Kazuki; Kyoto University, Department of Pharmacoepidemiology<br>Kanazawa, Yuji; Shiga Medical Centre for Children, Department of Otolaryngology<br>Takeda, Chikashi; Kyoto University, Department of Pharmacoepidemiology<br>Nakamori, Yuki; Mie University Hospital, Department of Clinical Anesthesiology<br>Matsunari, Yasunori; Mie University Hospital, Department of Clinical Anesthesiology<br>Sakai, Michihiro; Mie University Hospital, Department of Clinical Anesthesiology<br>Kawakami, Koji; Graduate School of Medicine and Public Health, Kyoto University, Department of Pharmacoepidemiology<br>Kamei, Masataka; Mie University Graduate School of Medicine Faculty of Medicine, Department of Clinical Anesthesiology |
| <b>Primary Subject Heading</b>: | Anaesthesia                                                                                                                                                                                                                                                                                                                                                                                                                                                                                                                                                                                                                                                                                                                                                                                                                                                                             |
| Secondary Subject Heading:      | Anaesthesia                                                                                                                                                                                                                                                                                                                                                                                                                                                                                                                                                                                                                                                                                                                                                                                                                                                                             |
| Keywords:                       | Paediatric anaesthesia < PAEDIATRICS, International health services < HEALTH SERVICES ADMINISTRATION & MANAGEMENT, Change management < HEALTH SERVICES ADMINISTRATION & MANAGEMENT, Paediatric otolaryngology < OTOLARYNGOLOGY, Paediatric surgery < SURGERY                                                                                                                                                                                                                                                                                                                                                                                                                                                                                                                                                                                                                            |
|                                 |                                                                                                                                                                                                                                                                                                                                                                                                                                                                                                                                                                                                                                                                                                                                                                                                                                                                                         |

SCHOLARONE™  
Manuscripts

1  
2  
3 **The use of preoperative haemostasis and ABO blood typing tests in children: A**  
4 **retrospective observational study using a nationwide claims database in Japan**  
5  
6  
7  
8  
9

10 Hiroshi Yonekura, M.D., M.P.H.<sup>a,b</sup>, Kazuki Ide, Ph.D.<sup>b</sup>, Yuji Kanazawa, M.D., Ph.D.<sup>c</sup>,  
11 Chikashi Takeda, M.D.<sup>b</sup>, Yuki Nakamori, M.D.<sup>a</sup>, Yasunori Matsunari, M.D., Ph.D.<sup>a</sup>,  
12 Michihiro Sakai, M.D., Ph.D.<sup>a</sup>, Koji Kawakami, M.D., Ph.D.<sup>b</sup>, Masataka Kamei, M.D.,  
13 Ph.D.<sup>a</sup>  
14  
15  
16  
17  
18  
19  
20

21 <sup>a</sup>Department of Clinical Anesthesiology, Mie University Hospital, 2-174 Edobashi, Tsu, Mie,  
22 514-8507, Japan  
23  
24

25 <sup>b</sup>Department of Pharmacoepidemiology, Graduate School of Medicine and Public Health,  
26 Kyoto University, Yoshida Konoe-cho, Sakyo-ku, Kyoto, 606-8501, Japan  
27  
28

29 <sup>c</sup>Department of Otolaryngology, Shiga Medical Center for Children, 5-7-30 Moriyama,  
30 Moriyama City, Shiga, 524-0022, Japan  
31  
32  
33  
34  
35  
36  
37

38 **Corresponding Author:**

39 Hiroshi Yonekura, M.D., M.P.H

40 Department of Clinical Anesthesiology,

41 Mie University, 2-174 Edobashi, Tsu, Mie 514-8507, Japan

42 Phone: +81-59-231-5634

43 Fax: +81-59-231-5140

44 Email: [hyonekura@clin.medic.mie-u.ac.jp](mailto:hyonekura@clin.medic.mie-u.ac.jp)  
45  
46  
47  
48  
49  
50  
51  
52  
53  
54  
55

56 **Word count: 3154**  
57  
58  
59  
60

## ABSTRACT

**Objectives:** To describe the prevalence and factors associated with preoperative haemostasis and ABO blood typing tests for children because these tests might represent low-value care.

**Design:** A retrospective observational study.

**Setting:** Nationwide insurance claims database in Japan

**Participants:** Patients aged 1–17 years who underwent common non-cardiac surgeries between April 2012 and March 2018 were included. Patients with high-risk comorbidities for bleeding (n=175) and those with multiple eligible surgeries were excluded (n=2,121).

**Main outcome measures:** We described the proportions of each preoperative test performed within 60 days before an index surgery, including platelet count, prothrombin time (PT), activated partial thromboplastin time (aPTT), and ABO blood typing tests. We also explored the associations between patient- and institutional-level factors and any preoperative tests, using multilevel logistic regression analysis.

**Results:** We included 13,018 patients (median [interquartile range] age, 5.2 [2.9–7.7] years; 8,276 [63.6%] boys) from 1,499 institutions. The overall proportion of each test was as follows: platelet count, 78.6%; PT, 54.4%; aPTT, 56.4%; and ABO blood typing tests, 50.4%. The proportion of patients undergoing any preoperative tests in the overall sample was 79.3%. Multilevel logistic regression analysis indicated that preoperative tests were associated with type of anaesthesia (general anaesthesia: adjusted odds ratio [OR], 7.06; 95% confidence interval [CI], 4.94–10.11), type of surgery (tonsillectomy: adjusted OR, 3.45; 95% CI, 2.75–4.33), and surgical setting (inpatient procedure: adjusted OR, 5.41; 95% CI, 3.83–7.66). There was one postoperative transfusion event (0.008%) in the entire cohort and 37 postoperative re-operation events for surgical bleeding after tonsillectomy (0.90%).

1  
2  
3 **Conclusions:** In the largest Japanese cohort reported to date, preoperative haemostasis and  
4  
5 ABO blood typing tests were performed in a majority of children prior to common paediatric  
6  
7 surgeries. Preoperative tests were associated with anaesthesia, surgical type, and surgical  
8  
9 setting.  
10  
11  
12

13 **Keywords:** preoperative test, haemostasis test, blood typing test, paediatrics, overuse  
14  
15  
16  
17  
18  
19  
20  
21  
22  
23  
24  
25  
26  
27  
28  
29  
30  
31  
32  
33  
34  
35  
36  
37  
38  
39  
40  
41  
42  
43  
44  
45  
46  
47  
48  
49  
50  
51  
52  
53  
54  
55  
56  
57  
58  
59  
60

For peer review only



## STRENGTHS AND LIMITATIONS OF THIS STUDY

- This is the first and largest study to investigate the epidemiology of preoperative testing among children undergoing non-cardiac surgery by using the nationwide insurance claims database.
- The study included children who have not typically been investigated in previous studies regarding preoperative testing.
- Baseline information about overuse of preoperative tests in Japan was established.
- Limitations of this study include its retrospective nature and generalizability to other countries with different clinical practices and health care systems.
- Detailed information such as patients' symptoms and results of blood tests was lacking.

## INTRODUCTION

The inappropriate use of medical service has gained much attention and has led to the Choosing Wisely (CW) initiative, which aimed to reduce unnecessary tests, treatments, and procedures.[1] As part of the CW campaign, the American Society of Anesthesiologists (ASA) recommends this: ‘Do not obtain baseline laboratory studies in patients without significant systemic disease undergoing low-risk surgery’.[2] Although practical guidelines and textbooks consistently describe the inappropriateness of routine preoperative tests,[3,4,5] they do not cover paediatric patients who will undergo elective procedures or surgeries. There is a paucity of data describing this important cohort of patients. In the guideline from the French Society of Anesthesiology and Intensive Care (SFAR), routine preoperative coagulation and ABO blood type screening tests for elective paediatric surgery were generally not recommended.[6,7] A recent national study conducted in France including 0.24 million children showed that even the re-operation rates for postoperative bleeding were very low, with a large number of patients undergoing the coagulation (49%) and ABO typing (50%) tests before adenoidectomy and tonsillectomy.[8] This French study suggested an inconsistency between the guidelines and real-world practice.[6,7,8]

In general, routine preoperative blood tests, without clinical indications, are representative of low-value care and cannot be justified.[5,9] Routine preoperative tests for children do warrant a reconsideration of their clinical utility, as they are costly, time consuming, and especially stressful (even painful) for children. Despite its clinical and public health importance, limited information is available regarding the frequency of these preoperative tests before elective paediatric surgery and the manner in which their utilisation is affected by individual patient- and institutional-level characteristics in a real-world setting. Hence, it is important to establish baseline data to understand the problem of low-value care.[10,11]

1  
2  
3 Therefore, we aimed to estimate the proportion of children who underwent preoperative  
4 haemostasis and ABO blood typing tests prior to common paediatric surgery in Japan.  
5  
6

7 Moreover, we sought to identify the patient- and institutional-level factors associated with  
8 preoperative tests.  
9  
10  
11  
12  
13  
14  
15  
16  
17  
18  
19  
20  
21  
22  
23  
24  
25  
26  
27  
28  
29  
30  
31  
32  
33  
34  
35  
36  
37  
38  
39  
40  
41  
42  
43  
44  
45  
46  
47  
48  
49  
50  
51  
52  
53  
54  
55  
56  
57  
58  
59  
60

## MATERIAL AND METHODS

This retrospective observational study was conducted according to the ‘STrengthening the Reporting of OBservational studies in Epidemiology’ (STROBE) guidelines.[12] This study was approved by the Ethics Committee of our institution (Approval number: H2018-094), who waived the requirement for obtaining informed consent from the patients due to the anonymous nature of the data.

### Data sources

The data were provided by a commercial database vendor, JMDC Co., Ltd (Tokyo, Japan).[13] The JMDC database is one of the largest commercial claims databases available in Japan, with claims from approximately 18% of all society-managed health insurance associations in Japan.[14] This database has accumulated reimbursement data from 5.6 million insured individuals since 2005. In particular, the JMDC database contains claims data of employees as well as their families, who can access freely to any health care facility (public and private) under universal health coverage in Japan. The database contains the following information: patient demographic information (age and sex), medical and pharmacy claims data (inpatient, outpatient, and emergency department), clinical diagnoses coded using the International Classification of Diseases 10<sup>th</sup> revision (ICD-10), and medical procedures defined using Japan-specific standardised procedure codes (K codes).[13,15] This database was widely used in epidemiological studies, and details of the database have been previously described.[13,15,16,17]

### Study population

We used these original Japanese K codes to identify the eligible common paediatric surgeries (otolaryngology, head and neck surgery, including tonsillectomy with or without adenoidectomy, ophthalmologic surgery [strabismus surgery or eyelid surgery for congenital

ptosis], superficial surgery [inguinal hernia or umbilical hernia], and urologic surgery [surgery of an undescended testis, hypospadias, or circumcision]; Online Supplementary Table S1) from April 1, 2012, to March 31, 2018. Included surgeries were commonly performed in children and based on the previous literature.[8] We especially chose tonsillectomy as the representative procedure in this study because tonsillectomy is one of the most commonly performed paediatric surgeries, a surgical procedure with relatively high risk of bleeding, and is a well-studied procedure in children.[8] We included patients aged 1–17 years with at least 12 months of insurance eligibility before their index surgery, who had at least 1 claim during the study period.[15] Patients with high-risk comorbidities for bleeding (i.e., patient with coagulopathy including hereditary bleeding disorders, or with any malignancy, including leukaemia and lymphoma) [18] who underwent an eligible procedure were also excluded.[8] To eliminate the effects of within-subject correlation among patients with multiple eligible surgeries, only the first surgery per person was considered.[16]

## Outcomes

Medical billing within 60 days before the index procedure (but not including the day of the index surgery) was used to identify our primary outcome, according to previous studies,[10,16] which included the receipt of any of the following preoperative blood tests: platelet count, prothrombin time (PT), activated partial thromboplastin time (aPTT), and ABO blood typing tests.[8] The Japanese claims codes used in this study are provided in Online Supplementary Table S2.

To explore the clinical significance of these coagulation tests (PT or aPTT) more closely, we performed a supplementary analysis using a sub-cohort of restricting patients who underwent tonsillectomy with or without adenoidectomy, because their postoperative bleeding is relatively common, compared to other patients undergoing low-risk procedures. We

1  
2  
3 examined the reoperation rate attributed to bleeding 1-14 days after surgeries.[19] We  
4  
5 defined the reoperation after tonsillectomy as reoperation for haemostasis due to post-  
6  
7 tonsillectomy bleeding (K377 and K367) based on the previous studies.[19,20] In addition,  
8  
9 we collected red blood cell transfusions during the first two postoperative days (including the  
10  
11 day of index surgery) as postoperative adverse events based on the previous study.[8]  
12  
13  
14

### 15 **Predictor variables of preoperative tests**

16  
17 We examined several predictors of preoperative tests, including patient demographics (age  
18  
19 and sex), comorbidities, type of anaesthesia, surgical procedure, surgical setting, and medical  
20  
21 facility status, based on clinical experience and previous literatures.[8,16]  
22  
23  
24

25  
26 Diagnostic ICD-10 codes within the 360 days before an index surgery, except the month of  
27  
28 the index surgery, were used to identify the presence of chronic comorbidities, including  
29  
30 asthma, obesity, coagulopathy, and any malignancy, including leukaemia and  
31  
32 lymphoma.[15,18,21] Based on the claims codes, the type of anaesthesia was categorised as  
33  
34 general anaesthesia or not. The surgical procedure was categorised as tonsillectomy (with or  
35  
36 without adenoidectomy) or other procedures. We used tonsillectomy procedures as a  
37  
38 representative scenario to compare our study with previous investigations.[8] The surgical  
39  
40 setting was classified as outpatient or inpatient procedure, based on the JMDC claims data.  
41  
42 Hospital status was determined using the JMDC medical facility code and was classified  
43  
44 according to the number of beds at the medical facility (<100, or  $\geq$ 100 beds). Teaching  
45  
46 hospital was defined as university hospital and public hospitals with advanced  
47  
48 functions.[15,16]  
49  
50  
51  
52  
53

### 54 **Statistical analysis**

55  
56  
57  
58  
59  
60

Analyses were conducted based on the previously established methodology.[10,16,22] First, we performed a descriptive analysis to estimate the proportion of patients who received each kind and any of the specified preoperative tests, for the entire cohort and for each procedure category (tonsillectomy and other procedures). Continuous variables are presented as median (interquartile range), whereas categorical variables are presented as number (proportion).

To consider the nesting of all patients within medical institutions, we conducted a multilevel logistic regression analysis. We included all covariates except 'institution' as fixed effects; thus, age, sex, comorbidities, type of anaesthesia, surgical procedure, surgical setting, number of beds at the medical facility, teaching hospital status, and surgical volume quartile were included based on clinical relevance and previous studies.[10,15,16] The institution was used as a random effect, to account for clustering effects in ordering preoperative tests across medical institutions.[10,16] The adjusted odds ratio (OR) and 95% confidence interval (CI) were reported, along with the P values. We summarised the inter-institutional variation in the utilisation pattern of preoperative tests between medical institutions in terms of the median odds ratio (MOR), which is the transformation of the random effect variance into an OR scale.[23,24,25] The MOR indicates heterogeneity in the ordering pattern of preoperative tests by comparing 2 individuals with the same covariates from 2 different randomly chosen medical institutions.[16] MOR can be directly compared to the OR of fixed-effect variables.[23,25] The 95% confidence interval for the MOR was calculated from 5,000 bootstrap resampled data sets.[24]

Subgroup analyses, as planned priori, were performed according to the type of anaesthesia (general anaesthesia vs. other anaesthesia) and the type of surgery (tonsillectomy vs. other procedures).

1  
2  
3 Restricting the sub-cohort undergoing tonsillectomy procedure, we compared the patients  
4 with coagulation tests (PT or aPTT) to those without such tests using the  $\chi^2$  test. Penalised  
5 logistic regression analysis (Firth's penalised likelihood approach) [26] adjusted for patient  
6 demographics (age, sex) was used to examine the association between preoperative  
7  
8  
9  
10  
11  
12  
13  
14  
15  
16  
17  
18  
19  
20  
21  
22  
23  
24  
25  
26  
27  
28  
29  
30  
31  
32  
33  
34  
35  
36  
37  
38  
39  
40  
41  
42  
43  
44  
45  
46  
47  
48  
49  
50  
51  
52  
53  
54  
55  
56  
57  
58  
59  
60

coagulation tests and post-tonsillectomy bleeding.

All analyses were performed using SAS 9.4 for Windows (SAS Institute Inc.; Cary, NC, USA). A 2-sided  $\alpha$  level of 0.05 was considered statistically significant.

### **Patient and public involvement**

This study has no patient or public involvement in the development of its design or implementation.



## RESULTS

### Study cohort

Figure 1 shows the study flow diagram. The initial cohort undergoing eligible surgery consisted of 29,830 eligible procedures. The final cohort comprised 13,018 patients from 1,499 institutions between April 1, 2012, and March 31, 2018 (Figure 1).

### Characteristics of the study cohort

Table 1 summarises the patient- and institutional-level characteristics. Among the patients included, 63.6% were male (n=8,276); the overall median (IQR) age was 5.2 (2.9–7.7) years. Moreover, 80.3% (n=10,454) and 82.1% (n=10,683) of the procedures were performed in an inpatient setting and under general anaesthesia, respectively. Tonsillectomy procedures accounted for 4,104 (31.5%) of all the procedures included.

Table 1. Characteristics of the study cohort according to the procedure type

| Characteristics             | Tonsillectomy procedure<br>(n=4104) | Other procedures<br>(n=8914) | Overall<br>(n=13018) |
|-----------------------------|-------------------------------------|------------------------------|----------------------|
| Age, years                  |                                     |                              |                      |
| Median (IQR)                | 5.9 (4.7–7.9)                       | 4.4 (2.1–7.4)                | 5.2 (2.9–7.7)        |
| 1–3                         | 507 (12.4)                          | 4034 (45.3)                  | 4541(34.9)           |
| 4–10                        | 3044 (74.2)                         | 3511 (39.4)                  | 6555 (50.4)          |
| 11–17                       | 553 (13.5)                          | 1369 (15.4)                  | 1922 (14.8)          |
| Sex, male                   | 2616 (63.7)                         | 5660 (63.5)                  | 8276 (63.6)          |
| Comorbidity 12 months prior |                                     |                              |                      |

|    |                      |             |             |              |
|----|----------------------|-------------|-------------|--------------|
| 1  |                      |             |             |              |
| 2  |                      |             |             |              |
| 3  | Asthma               | 1948 (47.5) | 3435 (38.5) | 5383 (41.4)  |
| 4  |                      |             |             |              |
| 5  | Obesity              | 19 (0.5)    | 16 (0.2)    | 35 (0.3)     |
| 6  |                      |             |             |              |
| 7  |                      |             |             |              |
| 8  | Type of anaesthesia  |             |             |              |
| 9  |                      |             |             |              |
| 10 | General anaesthesia  | 4098 (99.9) | 6585 (73.9) | 10683 (82.1) |
| 11 |                      |             |             |              |
| 12 | Other anaesthesia    | 6 (0.2)     | 2329 (26.1) | 2335 (17.9)  |
| 13 |                      |             |             |              |
| 14 |                      |             |             |              |
| 15 | Surgical setting     |             |             |              |
| 16 |                      |             |             |              |
| 17 | Inpatient procedure  | 4097 (99.8) | 6357 (71.3) | 10454 (80.3) |
| 18 |                      |             |             |              |
| 19 | Outpatient procedure | 7 (0.2)     | 2557 (28.7) | 2564 (19.7)  |
| 20 |                      |             |             |              |
| 21 |                      |             |             |              |
| 22 | Number of beds       |             |             |              |
| 23 |                      |             |             |              |
| 24 | <100                 | 108 (2.6)   | 2221 (24.9) | 2329(17.9)   |
| 25 |                      |             |             |              |
| 26 | ≥100                 | 3996 (97.4) | 6693 (75.1) | 10689 (82.1) |
| 27 |                      |             |             |              |
| 28 | Teaching hospital    | 558 (13.6)  | 1712 (19.2) | 2270 (17.4)  |
| 29 |                      |             |             |              |
| 30 |                      |             |             |              |
| 31 | Year of surgery      |             |             |              |
| 32 |                      |             |             |              |
| 33 | 2012                 | 285 (6.9)   | 971 (10.9)  | 1256 (9.6)   |
| 34 |                      |             |             |              |
| 35 | 2013                 | 544 (13.3)  | 1784 (20.0) | 2328 (17.9)  |
| 36 |                      |             |             |              |
| 37 | 2014                 | 643 (15.7)  | 1335 (15.0) | 1978 (15.2)  |
| 38 |                      |             |             |              |
| 39 | 2015                 | 805 (19.6)  | 1391 (15.6) | 2196 (16.9)  |
| 40 |                      |             |             |              |
| 41 | 2016                 | 843 (20.5)  | 1556 (17.5) | 2399 (18.4)  |
| 42 |                      |             |             |              |
| 43 | 2017                 | 784 (19.1)  | 1520 (17.1) | 2304 (17.7)  |
| 44 |                      |             |             |              |
| 45 | 2018                 | 200 (4.9)   | 357 (4.0)   | 557 (4.3)    |
| 46 |                      |             |             |              |
| 47 |                      |             |             |              |
| 48 |                      |             |             |              |

Values are presented as frequencies (%) unless stated otherwise.

IQR, interquartile range

### Prevalence of preoperative tests

1  
2  
3 Table 2 shows the proportions of preoperative haemostasis and ABO blood typing tests for  
4 the entire cohort and for each procedure and anaesthesia category. The proportion of any  
5 preoperative test in the overall cohort was 79.3% (95% CI, 78.7%–80.0%). The overall  
6 proportion of each test was as follows: platelet count, 78.6% (95% CI, 77.9%–79.3%); PT,  
7 54.4% (95% CI, 53.5%–55.2%); aPTT, 56.4% (95% CI, 55.5%–57.2%); and ABO blood  
8 typing tests, 50.4% (95% CI, 49.5%–51.3%). The overall proportions of each test in patients  
9 undergoing tonsillectomy (4,104 patients) were higher than those undergoing other  
10 procedures (platelet count, 95.5%; PT, 83.9%; aPTT, 85.7%; and ABO blood typing tests,  
11 79.3%). The overall proportions of each test under general anaesthesia were higher than those  
12 under other anaesthetic methods.  
13  
14  
15  
16  
17  
18  
19  
20  
21  
22  
23  
24  
25  
26  
27  
28  
29  
30  
31  
32  
33  
34  
35  
36  
37  
38  
39  
40  
41  
42  
43  
44  
45  
46  
47  
48  
49  
50  
51  
52  
53  
54  
55  
56  
57  
58  
59  
60

Table 2. Proportions of preoperative haemostasis and ABO blood typing tests in the study cohort

| Type of procedure                             | Tests; % of patients (95% CI) |                  |                  |                  |                  |
|-----------------------------------------------|-------------------------------|------------------|------------------|------------------|------------------|
|                                               | Platelet count                | PT               | aPTT             | ABO              | Any tests        |
| Overall (n=13018)                             | 78.6 (77.9–79.3)              | 54.4 (53.5–55.2) | 56.4 (55.5–57.2) | 50.4 (49.5–51.3) | 79.3 (78.7–80.0) |
| Procedure category                            |                               |                  |                  |                  |                  |
| Tonsillectomy procedure (n=4104)              | 95.5 (94.9–96.1)              | 83.9 (82.7–85.0) | 85.7 (84.7–86.8) | 79.3 (78.1–80.6) | 96.7 (96.1–97.2) |
| Other procedures (n=8914)                     | 70.9 (69.9–71.8)              | 40.8 (39.8–41.8) | 42.9 (41.8–43.9) | 37.1 (36.1–38.1) | 71.4 (70.4–72.3) |
| Anaesthesia category                          |                               |                  |                  |                  |                  |
| Procedure under general anaesthesia (n=10683) | 91.0 (90.5–91.6)              | 64.9 (64.0–65.9) | 67.4 (66.5–68.3) | 61.0 (60.1–61.9) | 91.9 (91.4–92.4) |
| Procedure under other anaesthesia (n=2335)    | 21.8 (20.2–23.5)              | 5.9 (4.9–6.8)    | 5.8 (4.9–6.8)    | 1.8 (1.3–2.3)    | 22.0 (20.3–23.7) |

aPTT, activated partial thromboplastin time; CI, confidence interval; PT, prothrombin time

## Multilevel logistic regression analyses

Table 3 shows the adjusted OR of the patient- and institutional-level factors with any preoperative tests. Patient medical factors (older age or asthma) were associated with the preoperative tests, but their adjusted ORs were relatively weak. There were significant associations between any preoperative tests and the type of anaesthesia (general anaesthesia: adjusted OR, 7.06; 95% CI, 4.94–10.11) relative to the reference group of other anaesthesia, type of surgery (tonsillectomy: adjusted OR, 3.45; 95% CI, 2.75–4.33) relative to the reference group of the other procedures, and surgical setting (inpatient surgery: adjusted OR, 5.41; 95% CI, 3.83–7.66). The MOR for inter-institutional variation was 2.89 (95% CI, 2.69–3.24).

Table 3. Multilevel logistic regression analysis of the characteristics associated with any preoperative tests (haemostasis or ABO blood typing tests) for children undergoing common non-cardiac surgeries

| Characteristic          | Adjusted OR | 95% CI    | P value             |
|-------------------------|-------------|-----------|---------------------|
| Age, years              |             |           | <0.001 <sup>a</sup> |
| 1–3                     | Reference   |           |                     |
| 4–10                    | 1.24        | 1.06–1.44 | 0.0059              |
| 11–17                   | 1.59        | 1.28–1.97 | <0.001              |
| Sex                     |             |           |                     |
| Male                    | Reference   |           |                     |
| Female                  | 1.12        | 0.98–1.29 | 0.10                |
| Comorbidities           |             |           |                     |
| Asthma                  | 1.29        | 1.12–1.48 | <0.001              |
| Obesity                 | 1.30        | 0.28–6.05 | 0.73                |
| Type of anaesthesia     |             |           |                     |
| Not general anaesthesia | Reference   |           |                     |

|    |                           |           |                        |                     |
|----|---------------------------|-----------|------------------------|---------------------|
| 1  |                           |           |                        |                     |
| 2  |                           |           |                        |                     |
| 3  | General anaesthesia       | 7.06      | 4.94–10.11             | <0.001              |
| 4  |                           |           |                        |                     |
| 5  | Type of procedures        |           |                        |                     |
| 6  |                           |           |                        |                     |
| 7  | Other procedures          | Reference |                        |                     |
| 8  |                           |           |                        |                     |
| 9  | Tonsillectomy procedure   | 3.45      | 2.75–4.33              | <0.001              |
| 10 |                           |           |                        |                     |
| 11 | Surgical setting          |           |                        |                     |
| 12 |                           |           |                        |                     |
| 13 | Outpatient procedure      | Reference |                        |                     |
| 14 | Inpatient procedure       | 5.41      | 3.83–7.66              | <0.001              |
| 15 |                           |           |                        |                     |
| 16 | Number of beds            |           |                        |                     |
| 17 | <100                      | Reference |                        |                     |
| 18 | ≥100                      | 1.91      | 1.41–2.57              | <0.001              |
| 19 |                           |           |                        |                     |
| 20 | Teaching facility         |           |                        |                     |
| 21 |                           |           |                        |                     |
| 22 | Teaching hospital         | Reference |                        |                     |
| 23 | Non-teaching hospital     | 0.77      | 0.55–1.09              | 0.14                |
| 24 |                           |           |                        |                     |
| 25 | Procedure volume quartile |           |                        | 0.0018 <sup>a</sup> |
| 26 |                           |           |                        |                     |
| 27 | Q1 (lowest)               | Reference |                        |                     |
| 28 | Q2                        | 1.18      | 0.91–1.52              | 0.22                |
| 29 | Q3                        | 1.63      | 1.10–2.40              | 0.015               |
| 30 | Q4 (highest)              | 2.23      | 1.15–4.31              | 0.018               |
| 31 |                           |           |                        |                     |
| 32 | MOR <sup>b</sup>          | 2.89      | 2.69–3.24 <sup>c</sup> |                     |
| 33 |                           |           |                        |                     |

<sup>a</sup>Overall P value.

<sup>b</sup>MOR indicates the inter-institutional variation of the utilisation of preoperative tests.

<sup>c</sup>The 95% CI for MOR was calculated by bootstrap resampling method.

CI, confidence interval; MOR, median odds ratio; OR, odds ratio.

### Postoperative adverse events

The incidence of postoperative transfusion events within postoperative 2 days was 1 patient (0.008%; 1 patient underwent hernia surgery) in the whole cohort. The incidence of postoperative re-operation for surgical bleeding after tonsillectomy was 0.90% (37 of 4,104); 31 of 3527 (0.88%) in patients undergoing preoperative coagulation tests and 6 of 577 (1.04%) in patients without preoperative tests (unadjusted OR, 0.84; 95% CI, 0.35–2.03,

1  
2  
3 P=0.70). Penalised logistic regression analysis revealed that the adjusted OR of preoperative  
4  
5  
6 coagulation tests for postoperative re-operation was 0.74 (95% CI, 0.34–1.91, P=0.60).  
7  
8  
9  
10  
11  
12  
13  
14  
15  
16  
17  
18  
19  
20  
21  
22  
23  
24  
25  
26  
27  
28  
29  
30  
31  
32  
33  
34  
35  
36  
37  
38  
39  
40  
41  
42  
43  
44  
45  
46  
47  
48  
49  
50  
51  
52  
53  
54  
55  
56  
57  
58  
59  
60

For peer review only

## DISCUSSION

We found that the preoperative tests were performed in a majority of children before undergoing common non-cardiac surgeries. Preoperative testing was strongly associated with type of anaesthesia, type of surgery, and surgical setting. There were quite low postoperative transfusion events, and no statistically significant difference in postoperative re-operation for surgical bleeding was found between patients with or without preoperative coagulation tests.

As the increased overuse globally, problems of low-value care have gained more attention recently.[9] To our knowledge, our study is the largest and most comprehensive population-based study investigating the preoperative tests before common paediatric surgeries. Our database could capture the whole series of preoperative tests ordered both at inpatient and outpatient settings. Therefore, our analysis can precisely describe the current preoperative testing status in Japan. Previous French nationwide cohort study did not have medical services data, including tests or procedures during inpatient episodes.[8] This recent French study showed that coagulation and ABO blood typing tests were performed in 49% and 50% of children before tonsillectomy, respectively.[8] Although the SFAR guideline did not recommend preoperative tests among children undergoing elective tonsillectomy,[6,7] there was still a high rate of unnecessary preoperative tests on paediatric patients.[8] Our results demonstrated that most children undergoing tonsillectomy underwent coagulation (PT, 84% and aPTT, 86%) and ABO blood typing (79%) tests, which were markedly higher compared to those of the recent French study.[8] Although not all of these preoperative tests are clinically inappropriate, preoperative coagulation tests for screening or predicting coagulopathy risk were not recommended. Standard haemostatic assessments (PT, aPTT, and platelet count) cannot help in detecting the most common congenital bleeding disorders, such as von Willebrand disease or haemophilia A, and cannot help in predicting perioperative



1  
2  
3 bleeding risk. The predictive value of haemostatic tests (PT, aPTT, and platelet count) for  
4  
5 determining perioperative bleeding risk of children undergoing tonsillectomy is generally  
6  
7 poor, with a low sensitivity of <44% and a positive predictive value of <29%. [7] In walking-  
8  
9 age children, a standardized questionnaire (personal or family history of haemorrhagic  
10  
11 diathesis) and physical examination are more sensitive than laboratory tests in the detection  
12  
13 of bleeding risk. [7,27] Abnormal results were not always associated with hereditary blood  
14  
15 disease. [7,8] False positive results can trigger further tests, leading to inappropriate  
16  
17 perioperative management and delay or cancellation of elective surgeries. [5,8] The increasing  
18  
19 number of blood tests can burden children and parents. As children consider phlebotomy as  
20  
21 one of the most frightening and painful health-related events, frequent experiences can lead  
22  
23 to increased distress in future procedures and development of needle fears, potentially leading  
24  
25 to health care avoidance behaviours. [28]

26  
27  
28  
29  
30  
31 Regarding the association of preoperative tests, we found a markedly high adjusted OR for  
32  
33 the type of anaesthesia and surgical setting. There was also a relatively high MOR for  
34  
35 medical institutions (i.e., the odds of receiving preoperative tests between two randomly  
36  
37 selected medical institutions varied by 2.89 times), suggesting inter-institutional variation in  
38  
39 ordering preoperative tests in children. These results were consistent with our previous report  
40  
41 on low-risk surgeries in Japan showing that preoperative blood tests performed in adult  
42  
43 patients before undergoing low-risk surgery (e.g., cataract, superficial surgery) were strongly  
44  
45 associated with the type of anaesthesia, patient characteristics, and medical facility  
46  
47 status. [15,16,17] Especially, the type of anaesthesia was the most important predictors in our  
48  
49 study focused in children and previous adult studies. [16] However, our findings were in  
50  
51 opposition to the SFAR guidelines, which recommended that haemostasis tests should not be  
52  
53 ordered regardless of anaesthesia type. [7] A guideline for preoperative tests has not been  
54  
55 established in Japan, and there is little consensus on whether preoperative testing is required,  
56  
57  
58  
59  
60

1  
2  
3 leading to variations in ordering patterns. Moreover, certain hospital factors, including  
4  
5 policies for preoperative management, provider preference, or the defensive medicine, may  
6  
7 partially explain this overuse and inter-institutional variation.[15,16]  
8  
9

10  
11 Our supplementary analysis showed that the need for postoperative transfusion within 2 days  
12  
13 was very rare. Moreover, re-operation incidence for post-tonsillectomy bleeding (objective  
14  
15 and reliable end point for evaluating clinically relevant bleeding after tonsillectomy) [19,20]  
16  
17 was low (0.9%), consistent with previous reports,[19,20] and there was no statistically  
18  
19 significant difference between patients with or without preoperative coagulation tests. A  
20  
21 previous randomised trial demonstrated that perioperative outcomes after low-risk surgery  
22  
23 were not different in patients with or without preoperative tests.[29] Previous studies have  
24  
25 investigated the utility of haemostasis tests in predicting bleeding risk among children  
26  
27 undergoing tonsillectomy, and a majority of studies concluded that the predictive value of  
28  
29 preoperative haemostasis tests was poor.[7] The preoperative coagulation tests before  
30  
31 paediatric non-cardiac surgery are largely unnecessary. It is important to reduce these tests  
32  
33 unless there is a clear indication not only because of the low-value care, which provides little  
34  
35 or no benefit at all, but also increasing cost of related health care. In 2016, the Japanese  
36  
37 government estimated that at least 2.4 million general anaesthesia cases were performed  
38  
39 annually, with patients aged 5 years and younger accounting for 2.7% of total inpatient  
40  
41 procedures performed under general anaesthesia (approximately 65,000 cases).[30,31] It is  
42  
43 apparent that increasing preoperative test overuse will burden the Japanese health care system  
44  
45 in future. Our findings could provide valuable baseline data about preoperative testing  
46  
47 overuse for not only clinicians but also for policymakers and promote the need for  
48  
49 reconsidering the routine clinical practice and the cost of these tests.[8,15]  
50  
51  
52  
53  
54  
55  
56  
57  
58  
59  
60

1  
2  
3 This study has several limitations. First, our claims database lacked important clinical  
4 information, such as patients' and family history of bleeding, symptoms, or abnormal  
5 physical examination, which may have influenced the indication of preoperative tests. As we  
6 did obtain neither the patient's nor the family's history of bleeding, we excluded the patients  
7 with diagnostic codes indicating hereditary bleeding disorders. The exclusion of patients with  
8 high-risk comorbidities for bleeding was based on ICD-10 codes using components of the  
9 Elixhauser comorbidities index.[18] Although the Elixhauser comorbidities index is a  
10 validated measure of comorbidities in insurance claims databases, similarly to that used in  
11 this study,[32] the diagnostic accuracy of each component was not validated in Japan. Thus,  
12 misclassification of comorbidities can lead to underestimation. Second, how the abnormal  
13 results of preoperative tests have affected perioperative course was unknown. As our  
14 database did not have the results of the blood tests, we were not able to interpret whether the  
15 coagulation test results were normal or abnormal. Therefore, we did not analyse the sequela  
16 of these findings. Third, there may be a selection bias with the inclusion of only specific  
17 paediatric surgeries in this study. However, we carefully chose to include common paediatric  
18 surgeries based on the recent publications.[8,19] We used tonsillectomy procedures as a  
19 representative scenario to compare our study with previous investigations.[8] Fourth, we  
20 could not access the data from the physician who ordered the preoperative tests and could not  
21 investigate the effects of clinician-related practice pattern. A previous study of low-risk  
22 surgery revealed that the practice patterns of the physicians were more likely associated with  
23 the preoperative testing rather than patients' comorbidities.[22] In future exploration, it is  
24 necessary to determine whether the degree of variation is rooted at the institutional or  
25 individual provider levels.[33] Given that our MOR for inter-institutional variation was 2.89,  
26 it would be important to compare institutions with high and low orders for these tests to  
27 investigate the reasons for their practice variation. Finally, this nationwide study limits the  
28  
29  
30  
31  
32  
33  
34  
35  
36  
37  
38  
39  
40  
41  
42  
43  
44  
45  
46  
47  
48  
49  
50  
51  
52  
53  
54  
55  
56  
57  
58  
59  
60

1  
2  
3 results' generalisability to other countries with different clinical practices and health care  
4 systems.[15,16] Nevertheless, our study can add significantly to the growing evidence on the  
5 prevalence of medical overuse worldwide.  
6  
7  
8

## 9 10 **CONCLUSION**

11  
12  
13 Preoperative haemostasis and ABO blood typing tests were performed in a majority of  
14 children before undergoing common paediatric surgeries despite the low postoperative  
15 transfusion and re-operation events. Preoperative tests were associated with the anaesthesia,  
16 surgical type, and surgical setting.  
17  
18  
19  
20  
21  
22  
23  
24  
25  
26  
27  
28  
29  
30  
31  
32  
33  
34  
35  
36  
37  
38  
39  
40  
41  
42  
43  
44  
45  
46  
47  
48  
49  
50  
51  
52  
53  
54  
55  
56  
57  
58  
59  
60

### **Author Contribution**

HY conceived the study, collected, analysed, interpreted the data and results, and drafted the manuscript. KI analysed the data and performed statistical analyses. HY, KI, YK, CT, YN, YM, MS, KK, and MK conceived the study and interpreted the data and drafted the manuscript. All authors critically revised the manuscript for intellectual content. All authors read and approved the final manuscript.

### **Funding**

This work was supported in part by grants from the Pfizer Health Research Foundation and the Japanese Society of Anesthesiologists.

### **Competing interest**

The authors have no conflict of interest directly relevant to the content of this article within 36 months prior to submission. KK received honoraria from Shin Nippon Biomedical Laboratories, Ltd.; research funds from Bayer Yakuhin Ltd., CMIC Co., Ltd., Novartis Pharma K.K., Suntory Beverage & Food Ltd., Dainippon Sumitomo Pharma Co., Ltd., and Stella Pharma Corporation; and holds stocks in School Health Record Center Co., Ltd. and Real World Data, Co., Ltd. There are no patent products under development or marketed products to declare, relevant to those companies.

### **Checklists for the appropriate reporting statement**

This retrospective observational study was conducted according to the “STrengthening the Reporting of OBservational studies in Epidemiology” (STROBE) guidelines.

### **Patient consent for publication**

Not required.

### **Ethics statement**

1  
2  
3 This study was by the Ethics Committee of Mie University Graduate School and Faculty of  
4  
5 Medicine (approval number: H2018-094), who waived the requirement for obtaining  
6  
7 informed consent from the patients due to the anonymous nature of the data.  
8  
9

### 10 **Provenance and peer review**

11  
12 Not commissioned; externally peer reviewed.  
13

### 14 **Data sharing statement**

15  
16 The data sets analysed in this study are available from the corresponding author on  
17  
18 reasonable request.  
19  
20

21 **Acknowledgments:** We thank the staff at JMDC Co., Ltd, Tokyo, Japan, for their assistance  
22  
23 with data preparation. We also thank our colleagues from the Department of  
24  
25 Pharmacoepidemiology, Graduate School of Medicine and Public Health, Kyoto University  
26  
27 for their assistance with data preparation. The authors also thank Editage  
28  
29 (<http://www.editage.jp>) for English language editing.  
30  
31  
32  
33  
34  
35  
36  
37  
38  
39  
40  
41  
42  
43  
44  
45  
46  
47  
48  
49  
50  
51  
52  
53  
54  
55  
56  
57  
58  
59  
60

## References

- 1 Cassel CK, Guest JA. Choosing wisely: helping physicians and patients make smart decisions about their care. *JAMA* 2012;307:1801–2.
- 2 American Society of Anesthesiologists. Five things physicians and patients should question, <https://www.choosingwisely.org/societies/american-society-of-anesthesiologists/>; 2013 (accessed 14 March 2019).
- 3 National Institute for Health and Care Excellence. Routine pre-operative tests for elective surgery, <https://www.nice.org.uk/guidance/NG45>; 2016 (accessed 7 March 2019).
- 4 Committee on Standards and Practice Parameters, Apfelbaum JL, Connis RT, et al. Practice advisory for preanesthesia evaluation: an updated report by the American Society of Anesthesiologists Task Force on Preanesthesia Evaluation. *Anesthesiology* 2012;116:522–38.
- 5 Wijesundera DN, Sweitzer BJ. Preoperative evaluation. In: Miller RD, ed. *Miller's Anesthesia*. 8th ed. Philadelphia, PA: Elsevier 2015:1085–156.
- 6 Molliex S, Pierre S, Bléry C, et al. Routine preinterventional tests. *Ann Fr Anesth Reanim* 2012;31:752–63.
- 7 Bonhomme F, Ajzenberg N, Schved JF, et al. Pre-interventional haemostatic assessment: Guidelines from the French Society of Anaesthesia and Intensive Care. *Eur J Anaesthesiol* 2013;30:142–62.
- 8 Beloeil H, Ruchard D, Drewniak N, et al. Overuse of preoperative laboratory coagulation testing and ABO blood typing: a French national study. *Br J Anaesth* 2017;119:1186–193.
- 9 Brownlee S, Chalkidou K, Doust J, et al. Evidence for overuse of medical services around the world. *Lancet* 2017;390:156–68.

- 1  
2  
3 10 Kirkham KR, Wijeyesundera DN, Pendrith C, et al. Preoperative laboratory  
4 investigations: rates and variability prior to low-risk surgical procedures.  
5  
6 *Anesthesiology* 2016;124:804–14.  
7  
8  
9  
10 11 Kirkham KR, Wijeyesundera DN, Pendrith C, et al. Preoperative testing before low-risk  
11 surgical procedures. *CMAJ* 2015;187:E349–58.  
12  
13  
14 12 Vandembroucke JP, Elm E von, Altman DG, et al. Strengthening the Reporting of  
15 Observational Studies in Epidemiology (STROBE): explanation and elaboration.  
16  
17 *Epidemiology* 2007;18:805–35.  
18  
19  
20 21 22 23 24 25 26 27 28 29 30 31 32 33 34 35 36 37 38 39 40 41 42 43 44 45 46 47 48 49 50 51 52 53 54 55 56 57 58 59 60
- 13 Kimura S, Sato T, Ikeda S, et al. Development of a database of health insurance  
claims: standardization of disease classifications and anonymous record linkage. *J  
Epidemiol* 2010;20:413–9.
- 14 Japan Medical Data Center. Features of JMDC claims database,  
<https://www.jmdc.co.jp/en/pharma/>; 2016 (accessed 10 October 2019).
- 15 Yonekura H, Ide K, Seto K, et al. Preoperative pulmonary function tests before low-  
risk surgery in Japan: a retrospective cohort study using a claims database. *J Anesth*  
2018;32:23–32.
- 16 Yonekura H, Seto K, Ide K, et al. Preoperative blood tests conducted before low-risk  
surgery in Japan: a retrospective observational study using a nationwide insurance  
claims database. *Anesth Analg* 2018;126:1633–40.
- 17 Ide K, Yonekura H, Kawasaki Y, et al. Influence of institution-based factors on  
preoperative blood testing prior to low-risk surgery: a Bayesian generalized linear  
mixed approach. *Comput Math Methods Med* 2017;2017:3624075.
- 18 Quan H, Sundararajan V, Halfon P, et al. Coding algorithms for defining comorbidities  
in ICD-9-CM and ICD-10 administrative data. *Med Care* 2005;43:1130–9.



- 1  
2  
3 19 Miyamoto Y, Shinzawa M, Tanaka S, et al. Perioperative steroid use for tonsillectomy  
4 and its association with reoperation for posttonsillectomy hemorrhage: a retrospective  
5 cohort study. *Anesth Analg* 2018;126:806–14.  
6  
7  
8  
9  
10 20 Suzuki S, Yasunaga H, Matsui H, et al. Impact of systemic steroids on  
11 posttonsillectomy bleeding: analysis of 61 430 patients using a national inpatient  
12 database in Japan. *JAMA Otolaryngol Head Neck Surg* 2014;140:906–10.  
13  
14  
15  
16  
17 21 Quan H, Li B, Couris CM, et al. Updating and validating the Charlson comorbidity  
18 index and score for risk adjustment in hospital discharge abstracts using data from 6  
19 countries. *Am J Epidemiol* 2011;173:676–82.  
20  
21  
22  
23  
24 22 Chen CL, Lin GA, Bardach NS, et al. Preoperative medical testing in Medicare  
25 patients undergoing cataract surgery. *N Engl J Med* 2015;372:1530–8.  
26  
27  
28  
29 23 Larsen K, Merlo J. Appropriate assessment of neighborhood effects on individual  
30 health: integrating random and fixed effects in multilevel logistic regression. *Am J*  
31 *Epidemiol* 2005;161:81–8.  
32  
33  
34  
35 24 Cordoba G, Siersma V, Lopez-Valcarcel B, et al. Prescribing style and variation in  
36 antibiotic prescriptions for sore throat: cross-sectional study across six countries. *BMC*  
37 *Fam Pract* 2015;16:7.  
38  
39  
40  
41  
42 25 Merlo J, Chaix B, Ohlsson H, et al. A brief conceptual tutorial of multilevel analysis in  
43 social epidemiology: using measures of clustering in multilevel logistic regression to  
44 investigate contextual phenomena. *J Epidemiol Community Health* 2006;60:290–7.  
45  
46  
47  
48  
49 26 Heinze G. A comparative investigation of methods for logistic regression with  
50 separated or nearly separated data. *Stat Med* 2006;25:4216–26.  
51  
52  
53  
54 27 Licameli GR, Jones DT, Santosuosso J, et al. Use of a preoperative bleeding  
55 questionnaire in pediatric patients who undergo adenotonsillectomy. *Otolaryngol Head*  
56 *Neck Surg* 2008;139:546–50.  
57  
58  
59  
60

- 1  
2  
3 28 Aydin D, Sahiner NC. Effects of music therapy and distraction cards on pain relief  
4 during phlebotomy in children. *Appl Nurs Res* 2017;33:164–8.  
5  
6  
7  
8 29 Schein OD, Katz J, Bass EB, et al. The value of routine preoperative medical testing  
9 before cataract surgery. Study of Medical Testing for Cataract Surgery. *N Engl J Med*  
10 2000;342:168–75.  
11  
12  
13  
14 30 Health Service Bureau, Ministry of Health, Labor and Welfare. The National Database  
15 of Health Insurance Claims and Specific Health Checkups of Japan (NDB) Open Data  
16 Japan (in Japanese),  
17 [https://www.mhlw.go.jp/stf/seisakunitsuite/bunya/0000177221\\_00002.html](https://www.mhlw.go.jp/stf/seisakunitsuite/bunya/0000177221_00002.html); 2018  
18 (accessed 5 January 2019).  
19  
20  
21  
22  
23  
24  
25  
26 31 Yonekura H. Epidemiology of general anesthesia practice in Japan: an ecological  
27 study using open data from the national database of health insurance claims and  
28 specific health checkups of Japan. *Ann Clin Anesth Res.* 2019; 3:1021.  
29  
30  
31  
32  
33 32 Kimura T, Sugitani T, Nishimura T, et al. Validation and recalibration of Charlson and  
34 Elixhauser Comorbidity Indices based on data from a Japanese insurance claims  
35 database. *Japanese J Pharmacoepidemiol/ Yakuzai ekigaku* 2019;24:53–64.  
36  
37  
38  
39  
40 33 Saver BG. Preoperative testing in patients undergoing cataract surgery. *N Engl J Med*  
41 2015;373:285.  
42  
43  
44  
45  
46  
47  
48  
49  
50  
51  
52  
53  
54  
55  
56  
57  
58  
59  
60

**Figure legends**

Figure 1. Study flow diagram.

**Supplementary material**

Supplemental Table S1: A list of all the surgeries included in the study.

Supplemental Table S2: A list of all the claim codes used to define the preoperative haemostasis and ABO blood typing tests included in the study.

1  
2  
3  
4  
5  
6  
7  
8  
9  
10  
11  
12  
13  
14  
15  
16  
17  
18  
19  
20  
21  
22  
23  
24  
25  
26  
27  
28  
29  
30  
31  
32  
33  
34  
35  
36  
37  
38  
39  
40  
41

Eligible surgeries from April 1,  
2012 to March 31, 2018  
N = 29,830

16,812 excluded  
N = 685  
Patients < 1 y of age  
N = 13,831  
Patients ≥ 18 y of age  
N = 2,121  
Multiple surgeries  
N = 175  
Patients with high-risk  
comorbidities

Available data  
N = 13,018

## Supplemental Digital Content 1

**Supplemental Table 1: Common pediatric surgeries included in the study cohort**

*Procedure type*

Japanese K procedure code      Details

*Otolaryngology, head, and neck surgery*

- |      |                                                                                |
|------|--------------------------------------------------------------------------------|
| K309 | ● Tympanoplasty with tubing                                                    |
| K370 | ● Adenoidectomy                                                                |
| K377 | ● Tonsillectomy<br>(excluding the reoperation for post-tonsillectomy bleeding) |

*Ophthalmologic surgery*

- |      |                                                                   |
|------|-------------------------------------------------------------------|
| K219 | ● Blepharoptosis repair<br>(eyelid surgery for congenital ptosis) |
| K242 | ● Strabismus surgery                                              |

*Superficial surgery*

- |      |                                                       |
|------|-------------------------------------------------------|
| K633 | ● Inguinal hernia repair<br>● Umbilical hernia repair |
|------|-------------------------------------------------------|

*Urologic surgery*

- |      |                                                                 |
|------|-----------------------------------------------------------------|
| K819 | ● Hypospadias repair                                            |
| K828 | ● Circumcision                                                  |
| K836 | ● Orchidopexy<br>(surgical correction of an undescended testis) |

## Supplemental Digital Content 2

**Supplemental Table 2: All the claim codes used to define the preoperative hemostasis and ABO blood typing tests included in the study**

| <b>Any one of the following claim codes<br/>(during days 1–60 prior to the index<br/>surgery)</b> | <b>Description</b>                    |
|---------------------------------------------------------------------------------------------------|---------------------------------------|
| <b>Platelet count</b>                                                                             |                                       |
| 160008010                                                                                         | Complete blood count (CBC)            |
| 160061810                                                                                         | Calculation charges                   |
| <b>Prothrombin time (PT)</b>                                                                      |                                       |
| 160012010                                                                                         | Prothrombin time                      |
| <b>Activated partial thromboplastin time (aPTT)</b>                                               |                                       |
| 160012310                                                                                         | Activated partial thromboplastin time |
| <b>ABO blood typing tests</b>                                                                     |                                       |
| 160039110                                                                                         | ABO blood typing                      |
| 160039210                                                                                         | Rh phenotype determination            |

## STROBE Statement—checklist of items that should be included in reports of observational studies

|                    | Item No. | Recommendation                                                                                      | Page No. | Relevant text from manuscript                                                                                                                                                                                                                                                                                                                                                                                                                                                                                                                                                                                                                                                                            |
|--------------------|----------|-----------------------------------------------------------------------------------------------------|----------|----------------------------------------------------------------------------------------------------------------------------------------------------------------------------------------------------------------------------------------------------------------------------------------------------------------------------------------------------------------------------------------------------------------------------------------------------------------------------------------------------------------------------------------------------------------------------------------------------------------------------------------------------------------------------------------------------------|
| Title and abstract | 1        | (a) Indicate the study's design with a commonly used term in the title or the abstract              | 1, 2     | “retrospective observational study”                                                                                                                                                                                                                                                                                                                                                                                                                                                                                                                                                                                                                                                                      |
|                    |          | (b) Provide in the abstract an informative and balanced summary of what was done and what was found | 2        | “We described the proportions of each preoperative test performed within 60 days before an index surgery, including platelet count, prothrombin time (PT), activated partial thromboplastin time (aPTT), and ABO blood typing tests. We also explored the associations between patient- and institutional-level factors and any preoperative tests, using multilevel logistic regression analysis.”<br><br>“The overall proportion of each test was as follows: platelet count, 78.6%; PT, 54.4%; aPTT, 56.4%; and ABO blood typing tests, 50.4%. The proportion of patients undergoing any preoperative tests in the overall sample was 79.3%. Multilevel logistic regression analysis indicated that ” |

1  
2  
3  
4  
5  
6  
7  
8  
9  
10  
11  
12  
13  
14  
15  
16  
17  
18  
19  
20  
21  
22  
23  
24  
25  
26  
27  
28  
29  
30  
31  
32  
33  
34  
35  
36  
37  
38  
39  
40  
41  
42  
43  
44  
45  
46

---

**Introduction**

---

|                      |   |                                                                                      |   |                                                                                                                                                                                                                                                                                                                            |
|----------------------|---|--------------------------------------------------------------------------------------|---|----------------------------------------------------------------------------------------------------------------------------------------------------------------------------------------------------------------------------------------------------------------------------------------------------------------------------|
| Background/rationale | 2 | Explain the scientific background and rationale for the investigation being reported | 5 | “Despite its clinical and public health importance, limited information is available regarding the frequency of these preoperative tests before elective paediatric surgery and the manner in which their utilisation is affected by individual patient- and institutional-level characteristics in a real-world setting.” |
|----------------------|---|--------------------------------------------------------------------------------------|---|----------------------------------------------------------------------------------------------------------------------------------------------------------------------------------------------------------------------------------------------------------------------------------------------------------------------------|

|            |   |                                                                  |   |                                                                                                                                                                                                                                                                                   |
|------------|---|------------------------------------------------------------------|---|-----------------------------------------------------------------------------------------------------------------------------------------------------------------------------------------------------------------------------------------------------------------------------------|
| Objectives | 3 | State specific objectives, including any prespecified hypotheses | 6 | “we aimed to estimate the proportion of children who underwent preoperative haemostasis and ABO blood typing tests prior to common paediatric surgery in Japan. Moreover, we sought to identify the patient- and institutional-level factors associated with preoperative tests.” |
|------------|---|------------------------------------------------------------------|---|-----------------------------------------------------------------------------------------------------------------------------------------------------------------------------------------------------------------------------------------------------------------------------------|

---

**Methods**

---

|              |   |                                                                                                                                 |   |                                                                                        |
|--------------|---|---------------------------------------------------------------------------------------------------------------------------------|---|----------------------------------------------------------------------------------------|
| Study design | 4 | Present key elements of study design early in the paper                                                                         | 7 | “This retrospective observational study was conducted”                                 |
| Setting      | 5 | Describe the setting, locations, and relevant dates, including periods of recruitment, exposure, follow-up, and data collection | 7 | “The data were provided by a commercial database vendor, JMDC Co., Ltd (Tokyo, Japan)” |

---



|    |              |   |                                                                                                                                                 |               |
|----|--------------|---|-------------------------------------------------------------------------------------------------------------------------------------------------|---------------|
| 1  |              |   |                                                                                                                                                 |               |
| 2  | Participants | 6 | (a) <i>Cohort study</i> —Give the eligibility criteria, and the sources and methods of selection of participants. Describe methods of follow-up | 7,            |
| 3  |              |   |                                                                                                                                                 | Supplementary |
| 4  |              |   |                                                                                                                                                 | Table S1,     |
| 5  |              |   | <i>Case-control study</i> —Give the eligibility criteria, and the sources and methods of case                                                   | 8             |
| 6  |              |   | ascertainment and control selection. Give the rationale for the choice of cases and controls                                                    |               |
| 7  |              |   | <i>Cross-sectional study</i> —Give the eligibility criteria, and the sources and methods of selection of                                        |               |
| 8  |              |   | participants                                                                                                                                    |               |
| 9  |              |   |                                                                                                                                                 |               |
| 10 |              |   |                                                                                                                                                 |               |
| 11 |              |   |                                                                                                                                                 |               |
| 12 |              |   |                                                                                                                                                 |               |
| 13 |              |   |                                                                                                                                                 |               |
| 14 |              |   |                                                                                                                                                 |               |
| 15 |              |   |                                                                                                                                                 |               |
| 16 |              |   |                                                                                                                                                 |               |
| 17 |              |   |                                                                                                                                                 |               |
| 18 |              |   |                                                                                                                                                 |               |
| 19 |              |   |                                                                                                                                                 |               |
| 20 |              |   |                                                                                                                                                 |               |
| 21 |              |   |                                                                                                                                                 |               |
| 22 |              |   |                                                                                                                                                 |               |
| 23 |              |   |                                                                                                                                                 |               |
| 24 |              |   |                                                                                                                                                 |               |
| 25 |              |   |                                                                                                                                                 |               |
| 26 |              |   |                                                                                                                                                 |               |
| 27 |              |   |                                                                                                                                                 |               |
| 28 |              |   |                                                                                                                                                 |               |
| 29 |              |   |                                                                                                                                                 |               |
| 30 |              |   |                                                                                                                                                 |               |
| 31 |              |   |                                                                                                                                                 |               |
| 32 |              |   |                                                                                                                                                 |               |
| 33 |              |   |                                                                                                                                                 |               |
| 34 |              |   |                                                                                                                                                 |               |
| 35 |              |   |                                                                                                                                                 |               |
| 36 |              |   |                                                                                                                                                 |               |
| 37 |              |   |                                                                                                                                                 |               |
| 38 |              |   |                                                                                                                                                 |               |
| 39 |              |   |                                                                                                                                                 |               |
| 40 |              |   |                                                                                                                                                 |               |
| 41 |              |   |                                                                                                                                                 |               |
| 42 |              |   |                                                                                                                                                 |               |
| 43 |              |   |                                                                                                                                                 |               |
| 44 |              |   |                                                                                                                                                 |               |
| 45 |              |   |                                                                                                                                                 |               |
| 46 |              |   |                                                                                                                                                 |               |

For peer review only

“We used these original Japanese K codes to identify the eligible common paediatric surgeries (otolaryngology, head and neck surgery, including tonsillectomy with or without adenoidectomy, ophthalmologic surgery [strabismus surgery or eyelid surgery for congenital ptosis], superficial surgery [inguinal hernia or umbilical hernia], and urologic surgery [surgery of an undescended testis, hypospadias, or circumcision]; Online Supplementary Table S1) from April 1, 2012, to March 31, 2018”

“We included patients aged 1–17 years with at least 12 months of insurance eligibility before their index surgery, who had at least 1 claim during the study period.[15] Patients with high-risk comorbidities for bleeding (i.e., patient with coagulopathy including hereditary bleeding disorders, or with any malignancy, including leukaemia and lymphoma) who underwent an eligible procedure

1  
2  
3  
4  
5  
6  
7  
8  
9  
10  
11  
12  
13  
14  
15  
16  
17  
18  
19  
20  
21  
22  
23  
24  
25  
26  
27  
28  
29  
30  
31  
32  
33  
34  
35  
36  
37  
38  
39  
40  
41  
42  
43  
44  
45  
46

|                              |    |                                                                                                                                                                                                                        |                                    |                                                                                                                                                                                                                                                                                                                                                                                                                                                                        |
|------------------------------|----|------------------------------------------------------------------------------------------------------------------------------------------------------------------------------------------------------------------------|------------------------------------|------------------------------------------------------------------------------------------------------------------------------------------------------------------------------------------------------------------------------------------------------------------------------------------------------------------------------------------------------------------------------------------------------------------------------------------------------------------------|
|                              |    |                                                                                                                                                                                                                        |                                    | were also excluded.[8] To eliminate the effects of within-subject correlation among patients with multiple eligible surgeries, only the first surgery per person was considered.”                                                                                                                                                                                                                                                                                      |
|                              |    | (b) <i>Cohort study</i> —For matched studies, give matching criteria and number of exposed and unexposed<br><i>Case-control study</i> —For matched studies, give matching criteria and the number of controls per case |                                    |                                                                                                                                                                                                                                                                                                                                                                                                                                                                        |
| Variables                    | 7  | Clearly define all outcomes, exposures, predictors, potential confounders, and effect modifiers.<br>Give diagnostic criteria, if applicable                                                                            | 8, 9,<br>Supplementary<br>Table S2 | “Medical <b>billing</b> within 60 days before the index procedure (but not including the day of the index surgery) were used to identify our primary outcome, according to previous studies”<br><br>“We examined several predictors of preoperative tests, including patient demographics (age and sex), comorbidities, type of anaesthesia, surgical procedure, surgical setting, and medical facility status, based on clinical experience and previous literatures” |
| Data sources/<br>measurement | 8* | For each variable of interest, give sources of data and details of methods of assessment (measurement). Describe comparability of assessment methods if there is more than one group                                   | 8,<br>Supplementary<br>Table S2    | “the receipt of any of the following preoperative blood tests: platelet count, prothrombin time (PT), activated partial thromboplastin                                                                                                                                                                                                                                                                                                                                 |

|            |    |                                                           |   |                                                                                                                                                                                                                                                                                                                                                                                                               |
|------------|----|-----------------------------------------------------------|---|---------------------------------------------------------------------------------------------------------------------------------------------------------------------------------------------------------------------------------------------------------------------------------------------------------------------------------------------------------------------------------------------------------------|
|            |    |                                                           |   | time (aPTT), and ABO blood typing tests.[8] The Japanese claims codes used in this study are provided in Online Supplementary Table S2.”                                                                                                                                                                                                                                                                      |
| Bias       | 9  | Describe any efforts to address potential sources of bias | 8 | “Patients with high-risk comorbidities for bleeding (i.e., patient with coagulopathy including hereditary bleeding disorders, or with any malignancy, including leukaemia and lymphoma) who underwent an eligible procedure were also excluded.[8] To eliminate the effects of within-subject correlation among patients with multiple eligible surgeries, only the first surgery per person was considered.” |
| Study size | 10 | Explain how the study size was arrived at                 |   | No relevant text                                                                                                                                                                                                                                                                                                                                                                                              |

Continued on next page

|    |                  |     |                                                                                                      |                                       |
|----|------------------|-----|------------------------------------------------------------------------------------------------------|---------------------------------------|
| 1  |                  |     |                                                                                                      |                                       |
| 2  | Quantitative     | 11  | Explain how quantitative variables were handled in the analyses. If applicable, describe which       | No relevant text                      |
| 3  | variables        |     | groupings were chosen and why                                                                        |                                       |
| 4  |                  |     |                                                                                                      |                                       |
| 5  | Statistical      | 12  | (a) Describe all statistical methods, including those used to control for confounding                | 10                                    |
| 6  | methods          |     |                                                                                                      |                                       |
| 7  |                  |     |                                                                                                      | “To consider the nesting of all       |
| 8  |                  |     |                                                                                                      | patients within medical institutions, |
| 9  |                  |     |                                                                                                      | we conducted a multilevel logistic    |
| 10 |                  |     |                                                                                                      | regression analysis.”                 |
| 11 |                  |     | (b) Describe any methods used to examine subgroups and interactions                                  | No relevant text                      |
| 12 |                  |     | (c) Explain how missing data were addressed                                                          | No relevant text                      |
| 13 |                  |     | (d) <i>Cohort study</i> —If applicable, explain how loss to follow-up was addressed                  | There were no follow-up cases.        |
| 14 |                  |     | <i>Case-control study</i> —If applicable, explain how matching of cases and controls was addressed   | no relevant text                      |
| 15 |                  |     | <i>Cross-sectional study</i> —If applicable, describe analytical methods taking account of sampling  |                                       |
| 16 |                  |     | strategy                                                                                             |                                       |
| 17 |                  |     | (e) Describe any sensitivity analyses                                                                | No relevant text                      |
| 18 |                  |     |                                                                                                      |                                       |
| 19 | <b>Results</b>   |     |                                                                                                      |                                       |
| 20 | Participants     | 13* | (a) Report numbers of individuals at each stage of study—eg numbers potentially eligible, examined   | 12                                    |
| 21 |                  |     | for eligibility, confirmed eligible, included in the study, completing follow-up, and analysed       |                                       |
| 22 |                  |     | (b) Give reasons for non-participation at each stage                                                 | Figure 1                              |
| 23 |                  |     |                                                                                                      | Figure 1 gives reasons for non-       |
| 24 |                  |     |                                                                                                      | participation at each stage.          |
| 25 |                  |     | (c) Consider use of a flow diagram                                                                   | 12,                                   |
| 26 |                  |     |                                                                                                      | Figure                                |
| 27 |                  |     |                                                                                                      | 1                                     |
| 28 |                  |     |                                                                                                      | “Figure 1 shows the study             |
| 29 | Descriptive data | 14* | (a) Give characteristics of study participants (eg demographic, clinical, social) and information on | 12, Table 1                           |
| 30 |                  |     | exposures and potential confounders                                                                  |                                       |
| 31 |                  |     |                                                                                                      | “Table 1 summarises the patient-      |
| 32 |                  |     |                                                                                                      | and institutional-level               |
| 33 |                  |     | (b) Indicate number of participants with missing data for each variable of interest                  | No participants with missing data     |
| 34 |                  |     | (c) <i>Cohort study</i> —Summarise follow-up time (eg, average and total amount)                     | No relevant text                      |
| 35 | Outcome data     | 15* | <i>Cohort study</i> —Report numbers of outcome events or summary measures over time                  | 14, Table 2                           |
| 36 |                  |     |                                                                                                      | “Table 2 shows the proportions of     |
| 37 |                  |     |                                                                                                      | preoperative haemostasis and ABO      |
| 38 |                  |     |                                                                                                      | blood typing tests for the entire     |
| 39 |                  |     |                                                                                                      | cohort and for each procedure and     |
| 40 |                  |     |                                                                                                      | anaesthesia category.”                |
| 41 |                  |     |                                                                                                      |                                       |
| 42 |                  |     |                                                                                                      |                                       |
| 43 |                  |     |                                                                                                      |                                       |
| 44 |                  |     |                                                                                                      |                                       |
| 45 |                  |     |                                                                                                      |                                       |
| 46 |                  |     |                                                                                                      |                                       |

|              |    |                                                                                                                                                                                                              |             |                                                                                                                                                                                                                                                      |
|--------------|----|--------------------------------------------------------------------------------------------------------------------------------------------------------------------------------------------------------------|-------------|------------------------------------------------------------------------------------------------------------------------------------------------------------------------------------------------------------------------------------------------------|
|              |    | <i>Case-control study</i> —Report numbers in each exposure category, or summary measures of exposure                                                                                                         |             |                                                                                                                                                                                                                                                      |
|              |    | <i>Cross-sectional study</i> —Report numbers of outcome events or summary measures                                                                                                                           |             |                                                                                                                                                                                                                                                      |
| Main results | 16 | (a) Give unadjusted estimates and, if applicable, confounder-adjusted estimates and their precision (eg, 95% confidence interval). Make clear which confounders were adjusted for and why they were included | 16, Table 3 | “Table 3 shows the adjusted OR of the patient- and institutional-level factors with any preoperative tests. Patient medical factors (older age or asthma) were associated with the preoperative tests, but their adjusted ORs were relatively weak.” |
|              |    | (b) Report category boundaries when continuous variables were categorized                                                                                                                                    |             |                                                                                                                                                                                                                                                      |
|              |    | © If relevant, consider translating estimates of relative risk into absolute risk for a meaningful time period                                                                                               |             |                                                                                                                                                                                                                                                      |

Continued on next page

|    |                   |    |                                                                                                |    |
|----|-------------------|----|------------------------------------------------------------------------------------------------|----|
| 1  |                   |    |                                                                                                |    |
| 2  | Other analyses    | 17 | Report other analyses done—eg analyses of subgroups and interactions, and sensitivity analyses | 14 |
| 3  |                   |    |                                                                                                |    |
| 4  |                   |    |                                                                                                |    |
| 5  |                   |    |                                                                                                |    |
| 6  |                   |    |                                                                                                |    |
| 7  |                   |    |                                                                                                |    |
| 8  |                   |    |                                                                                                |    |
| 9  |                   |    |                                                                                                |    |
| 10 |                   |    |                                                                                                |    |
| 11 |                   |    |                                                                                                |    |
| 12 |                   |    |                                                                                                |    |
| 13 |                   |    |                                                                                                |    |
| 14 |                   |    |                                                                                                |    |
| 15 |                   |    |                                                                                                |    |
| 16 |                   |    |                                                                                                |    |
| 17 |                   |    |                                                                                                |    |
| 18 | <b>Discussion</b> |    |                                                                                                |    |
| 19 | Key results       | 18 | Summarise key results with reference to study objectives                                       | 19 |
| 20 |                   |    |                                                                                                |    |
| 21 |                   |    |                                                                                                |    |
| 22 |                   |    |                                                                                                |    |
| 23 |                   |    |                                                                                                |    |
| 24 |                   |    |                                                                                                |    |
| 25 |                   |    |                                                                                                |    |
| 26 |                   |    |                                                                                                |    |
| 27 |                   |    |                                                                                                |    |
| 28 |                   |    |                                                                                                |    |
| 29 |                   |    |                                                                                                |    |
| 30 |                   |    |                                                                                                |    |
| 31 |                   |    |                                                                                                |    |
| 32 |                   |    |                                                                                                |    |
| 33 |                   |    |                                                                                                |    |
| 34 |                   |    |                                                                                                |    |
| 35 |                   |    |                                                                                                |    |
| 36 |                   |    |                                                                                                |    |
| 37 |                   |    |                                                                                                |    |
| 38 |                   |    |                                                                                                |    |
| 39 |                   |    |                                                                                                |    |
| 40 |                   |    |                                                                                                |    |
| 41 |                   |    |                                                                                                |    |
| 42 |                   |    |                                                                                                |    |
| 43 |                   |    |                                                                                                |    |
| 44 |                   |    |                                                                                                |    |
| 45 |                   |    |                                                                                                |    |
| 46 |                   |    |                                                                                                |    |

|                  |    |                                                                                                                                                                            |       |                                                                                                                                                                                                                                                                                                                   |
|------------------|----|----------------------------------------------------------------------------------------------------------------------------------------------------------------------------|-------|-------------------------------------------------------------------------------------------------------------------------------------------------------------------------------------------------------------------------------------------------------------------------------------------------------------------|
|                  |    |                                                                                                                                                                            |       | between patients with or without preoperative coagulation tests.”                                                                                                                                                                                                                                                 |
| Limitations      | 19 | Discuss limitations of the study, taking into account sources of potential bias or imprecision. Discuss both direction and magnitude of any potential bias                 | 22    | “This study has several limitations.”                                                                                                                                                                                                                                                                             |
| Interpretation   | 20 | Give a cautious overall interpretation of results considering objectives, limitations, multiplicity of analyses, results from similar studies, and other relevant evidence | 23    | “Preoperative haemostasis and ABO blood typing tests were performed in a majority of children before undergoing common paediatric surgeries despite the low postoperative transfusion and re-operation events. Preoperative tests were associated with the anaesthesia and surgical types, and surgical setting.” |
| Generalisability | 21 | Discuss the generalisability (external validity) of the study results                                                                                                      | 22,23 | “Finally, this nationwide study limits the results’ generalisability to other countries with different clinical practices and health care systems.[15,16] Nevertheless, our study can add significantly to the                                                                                                    |

1  
2  
3  
4  
5  
6  
7  
8  
9  
10  
11  
12  
13  
14  
15  
16  
17  
18  
19  
20  
21  
22  
23  
24  
25  
26  
27  
28  
29  
30  
31  
32  
33  
34  
35  
36  
37  
38  
39  
40  
41  
42  
43  
44  
45  
46

---

growing evidence on the prevalence of medical overuse worldwide.”

---

**Other information**

|         |    |                                                                                                                                                               |    |                                                                                                                                     |
|---------|----|---------------------------------------------------------------------------------------------------------------------------------------------------------------|----|-------------------------------------------------------------------------------------------------------------------------------------|
| Funding | 22 | Give the source of funding and the role of the funders for the present study and, if applicable, for the original study on which the present article is based | 24 | This work was supported in part by grants from the Pfizer Health Research Foundation and the Japanese Society of Anesthesiologists. |
|---------|----|---------------------------------------------------------------------------------------------------------------------------------------------------------------|----|-------------------------------------------------------------------------------------------------------------------------------------|

---

\*Give information separately for cases and controls in case-control studies and, if applicable, for exposed and unexposed groups in cohort and cross-sectional studies.

**Note:** An Explanation and Elaboration article discusses each checklist item and gives methodological background and published examples of transparent reporting. The STROBE checklist is best used in conjunction with this article (freely available on the Web sites of PLoS Medicine at <http://www.plosmedicine.org/>, Annals of Internal Medicine at <http://www.annals.org/>, and Epidemiology at <http://www.epidem.com/>). Information on the STROBE Initiative is available at [www.strobe-statement.org](http://www.strobe-statement.org).
