# Supplementary material for: Use of preoperative haemostasis and ABO blood typing tests in children: a retrospective observational study using a nationwide claims database in Japan
Source: PubMed Central journal article supplement — BMJ Open. 2019 Nov 27;9(11):e032306. doi: 10.1136/bmjopen-2019-032306 (PMC6886946; doi:10.1136/bmjopen-2019-032306), 2019-11-27
Supplement: bmjopen-2019-032306supp001.pdf [file bmjopen-2019-032306supp001.pdf]

## Supplemental Digital Content 1

**Supplemental Table 1: Common pediatric surgeries included in the study cohort**

| <i>Procedure type</i>                         |                                                                                |
|-----------------------------------------------|--------------------------------------------------------------------------------|
| Japanese K procedure code                     | Details                                                                        |
| <i>Otolaryngology, head, and neck surgery</i> |                                                                                |
| K309                                          | ● Tympanoplasty with tubing                                                    |
| K370                                          | ● Adenoidectomy                                                                |
| K377                                          | ● Tonsillectomy<br>(excluding the reoperation for post-tonsillectomy bleeding) |
| <i>Ophthalmologic surgery</i>                 |                                                                                |
| K219                                          | ● Blepharoptosis repair<br>(eyelid surgery for congenital ptosis)              |
| K242                                          | ● Strabismus surgery                                                           |
| <i>Superficial surgery</i>                    |                                                                                |
| K633                                          | ● Inguinal hernia repair<br>● Umbilical hernia repair                          |
| <i>Urologic surgery</i>                       |                                                                                |
| K819                                          | ● Hypospadias repair                                                           |
| K828                                          | ● Circumcision                                                                 |
| K836                                          | ● Orchidopexy<br>(surgical correction of an undescended testis)                |
